1 **SAICAr-dependent and independent effects of ADSL deficiency on**  
2 **neurodevelopment**

3  
4 Ilaria Dutto<sup>1,#</sup>, Julian Gerhards<sup>2,3,#</sup>, Antonio Herrera<sup>4</sup>, Alexandra Junza<sup>5,6</sup>, Oscar Yanes<sup>5,6</sup>,  
5 Cedric Boeckx<sup>7,8,9</sup>, Martin D. Burkhalter<sup>2</sup>, Sebastian Pons<sup>4</sup>, Melanie Philipp<sup>2,3</sup>, Jens  
6 Lüders<sup>1,\*</sup> and Travis H. Stracker<sup>1,10\*</sup>

7  
8  
9  
10 **Affiliations**

11 <sup>1</sup>Institute for Research in Biomedicine (IRB Barcelona), The Barcelona Institute of  
12 Science and Technology, Barcelona 08028, Spain.

13 <sup>2</sup>Department of Experimental and Clinical Pharmacology and Pharmacogenomics,  
14 Division of Pharmacogenomics, University of Tübingen, 72074 Tübingen, Germany.

15 <sup>3</sup>Institute of Biochemistry and Molecular Biology, Ulm University, 89081 Ulm, Germany.

16 <sup>4</sup>Department of Cell Biology, Instituto de Biología Molecular de Barcelona, Barcelona,  
17 Spain.

18 <sup>5</sup>Metabolomics Platform, IISPV, Department of Electronic Engineering, Universitat Rovira  
19 i Virgili, Tarragona, Spain.

20 <sup>6</sup>Spanish Biomedical Research Center in Diabetes and Associated Metabolic Disorders  
21 (CIBERDEM), Madrid, Spain

22 <sup>7</sup>ICREA, Passeig Lluís Companys 23, 08010, Barcelona, Spain.

23 <sup>8</sup>Institute of Complex Systems (UBICS), Universitat de Barcelona, 08007, Barcelona,  
24 Spain.

25 <sup>9</sup>Section of General Linguistics, Universitat de Barcelona, 08007, Barcelona, Spain.

26 <sup>10</sup>National Cancer Institute, Center for Cancer Research, Radiation Oncology Branch,  
27 Bethesda, MD 20892, USA.

28  
29 #These authors contributed equally to the manuscript.

30 \***Lead Contacts:** [travis.stracker@irbbarcelona.org](mailto:travis.stracker@irbbarcelona.org) and [jens.luders@irbbarcelona.org](mailto:jens.luders@irbbarcelona.org)

31 **Running title:** ADSL in neurodevelopment

32 **Keywords:** Adenylosuccinate Lyase, ADSL, ADSLD, microcephaly, cilia, SAICAr, DNA  
33 damage, de novo purine synthesis

34

35

36 **Abstract**

37 Adenylosuccinate Lyase (ADSL) functions in the *de novo* purine biosynthesis pathway.  
38 ADSL deficiency (ADSLD) causes numerous neurodevelopmental pathologies, including  
39 microcephaly and autism spectrum disorder. ADSLD patients have normal purine  
40 nucleotide levels but exhibit accumulation of the dephosphorylated ADSL substrates  
41 SAICAr and S-Ado. SAICAr was implicated in the neurotoxic effects of ADSLD, although  
42 its role remains unknown. We examined the effects of ADSL depletion in human cells and  
43 found increased DNA damage signaling, that was rescued by nucleosides, and impaired  
44 primary ciliogenesis, that was rescued by reducing SAICAr. By analyzing ADSL deficient  
45 chicken and zebrafish embryos we observed impaired neurogenesis and microcephaly,  
46 and neuroprogenitor attrition in zebrafish was rescued by reducing SAICAr. Zebrafish  
47 embryos also displayed phenotypes commonly linked to ciliopathies. Our results suggest  
48 that both reduced purine levels and SAICAr accumulation contribute to  
49 neurodevelopmental pathology in ADSLD and defective ciliogenesis may influence the  
50 ADSLD phenotypic spectrum.

51

52 **Introduction**

53 Adenylosuccinate lyase (ADSL) is a conserved homotetrameric enzyme that catalyzes  
54 two reactions in the *de novo* purine synthesis (DNPS) pathway(1). Mutations in *ADSL*  
55 cause adenylosuccinate lyase deficiency (ADSLD), an autosomal recessive disorder  
56 characterized by defects in purine metabolism and heterogeneous neurological  
57 phenotypes that include lack of eye-to-eye contact, auto-aggressive behavior, speech  
58 impairment, mild psychomotor delay, transient contact defects, autism spectrum disorder,  
59 epilepsy and in some cases, microcephaly, encephalopathy, ataxia or coma vigil(2, 3).  
60 While the incidence of ADSLD has not been fully established, over 80 patients have been  
61 diagnosed to date and subcategorized based on their symptoms that range from  
62 premature death to milder developmental and behavioral disorders(3).

63

64 ADSLD can be diagnosed by detecting elevated levels of the dephosphorylated substrates  
65 of ADSL, SAICAr and S-Ado, in body fluids(2). As normal levels of purine nucleotides were  
66 detected in serum from ADSLD patients, the accumulation of S-Ado, and particularly  
67 SAICAr, has been proposed to play a role in the disease pathology(2–4). In yeast, ADSL  
68 (*Ade13*) loss provokes genomic instability and is lethal(1, 5–7). Lethality in yeast can be  
69 rescued by deletion of a number of DNPS enzymes upstream of ADSL, or the transcription

70 factors that regulate the pathway, indicating that the accumulation of metabolic  
71 intermediates, rather than impaired DNPS, underlies toxicity(1, 7).

72

73 In *C. elegans*, ADSL loss caused delayed growth, infertility, reduced lifespan and  
74 locomotion defects. In some studies growth, lifespan and locomotion could be linked to  
75 the accumulation of SAICAr(7–9). Perfusion of rat brains with SAICAr led to cellular  
76 attrition in the hippocampus, leading to the proposition that SAICAr accumulation is  
77 neurotoxic, although the potential mechanism remains unknown(4). In glucose deprived  
78 cancer cells, SAICAR accumulation was shown to activate PKM2, and a number of other  
79 kinases, to promote cancer survival in glucose-limiting conditions, suggesting that purine  
80 metabolite accumulation could have distinct signaling outcomes that impact on cell  
81 behavior and fate during development(10–12). However, despite extensive enzymology  
82 and structural information, the underlying mechanisms by which neuropathology arises in  
83 ADSLD remain unknown.

84

85 To address the potential roles of ADSL deficiency in neurodevelopment, we systematically  
86 examined the consequences of ADSL depletion in diploid human cells and *in vivo*. We  
87 found that reduced ADSL function in human epithelial cells impaired cell cycle progression,  
88 induced DNA damage signaling and impaired primary ciliogenesis. Deletion of p53 or  
89 supplementation with nucleosides could rescue cell cycle and DNA damage signaling,  
90 respectively. In contrast, ciliogenesis defects were unaffected by p53 status or nucleoside  
91 supplementation and were dependent on SAICAr accumulation. Depletion of ADSL in  
92 chicken or zebrafish embryos impaired neurogenesis and caused developmental defects.  
93 In zebrafish this included microcephaly, which is observed in some ADSLD patients. In  
94 addition, fish embryos displayed ciliopathy related phenotypes and treatment with  
95 methotrexate, to inhibit DNPS upstream of ADSL, rescued impaired neurogenesis.  
96 Together our results indicate that ADSL depletion causes context-dependent phenotypes  
97 associated with both nucleotide depletion and metabolite production that together impact  
98 neurodevelopment.

99

## 100 **Results**

### 101 **ADSL depletion causes p53-dependent proliferation defects**

102 To investigate the impact of ADSL on cellular homeostasis, we depleted ADSL with a pool  
103 of four siRNAs in hTERT-immortalized human retinal epithelial cells (hTERT-RPE-1,

104 referred to henceforth as RPE-1). Depletion of ADSL was effective with 80% depletion of  
105 the mRNA and a clear reduction in protein levels (Figures 1A, B). This was accompanied  
106 by reduced levels of AMP and GMP (Figure S1A), as well as accumulation of S-Ado  
107 (Figure 1C). We further validated the siRNA pool using one effective single siRNA (#2)  
108 (Figure S1B). As ADSL is critical for DNPS, we examined cell growth following ADSL  
109 depletion and found reduced levels of proliferation in ADSL depleted cells compared to  
110 controls (Figure 1D). ADSL depleted cells frequently lacked Ki67 expression, indicating  
111 that some cells were exiting the cell cycle, and had increased levels of p53 (Figures 1E,  
112 F). Deletion of *TP53* rescued proliferation and restored the number of Ki67-positive cells  
113 (Figure 1G, S1G), and the reduction in Ki67-positive cells could also be prevented by  
114 stable expression of an siRNA resistant allele of *ADSL* (*ADSL\**) (Figures 1H, S1F). Trypan  
115 blue and  $\beta$ -galactosidase assay indicated that there was not a detectable increase in cell  
116 death (Figure S1C) and that the Ki67 negative cells were likely quiescent and not  
117 senescent (Figure S1D). We also checked whether RPE-1 cells underwent differentiation  
118 by staining with Vimentin, a marker of undifferentiated cells(13), and Cytokeratin 20  
119 (CK20), a marker of differentiation, upon ADSL depletion. We did not observe any CK20  
120 signal or a reduction in Vimentin positive cells in the population upon ADSL silencing  
121 compared to the controls, arguing against premature differentiation (Figure S1E).

122

123 To identify the cause of cell cycle exit, we supplemented cells with nucleosides, to restore  
124 purine levels, or treated with MRT00252040, a small molecule inhibitor of  
125 phosphoribosylaminoimidazole carboxylase (PAICS), to reduce elevated SAICAr levels  
126 (14). Supplementation of ADSL depleted RPE-1 cells with nucleosides did not prevent p53  
127 induction or cell cycle exit (Figures 1I, J). Similarly, treatment with MRT00252040 did not  
128 influence p53 or loss of Ki67 (Figure 1K, L). This demonstrated that ADSL depletion in  
129 non-transformed human epithelial cells leads to a partial p53-dependent cell cycle  
130 exit/arrest that is not rescued by nucleoside supplementation or reduction in SAICAr  
131 levels.

**Figure 1**

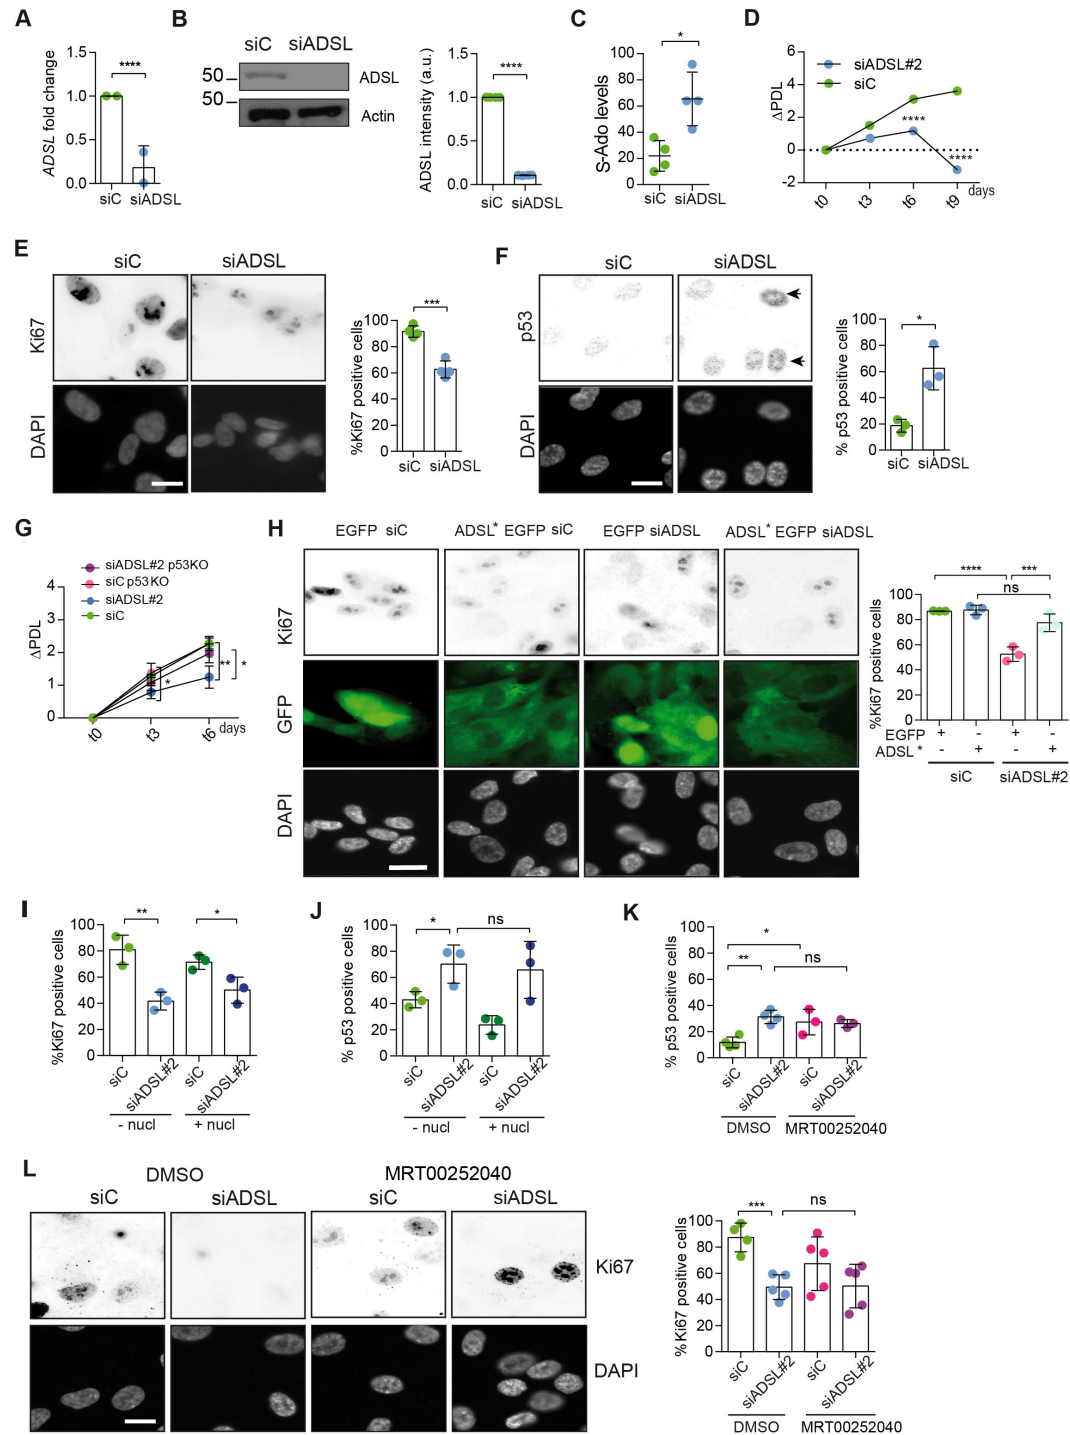

132

133

134

135

136

**Figure 1. ADSL depletion causes p53-dependent proliferation defects.** **A.** Reduced mRNA levels of *ADSL* confirmed by qRT-PCR experiments. hTERT-RPE-1 were silenced with smart pool RNAi for 96 hrs before harvesting. Two independent experiments in triplicate are shown in the panel (n=2 two-tailed *t*-test, \*\*\*\**p*< 0.0001) **B.** Western blot of

137 RPE-1 cell extracts treated as in (A). One experiment is shown as representative of three  
138 independent experiments. Actin was used as a loading control. Quantifications of ADSL  
139 intensity in four different experiments were performed by ImageJ software and normalized  
140 to actin first and then to the relative controls (n=4, two-tailed *t* test, \*\*\*\**p*<0.0001). **C.**  
141 Increased S-Ado levels were detected in ADSL-depleted RPE-1 cells and compared to  
142 the controls. (n=4, two-tailed *t* test, \**p*<0.05). **D.** Cell proliferation rates of RPE-1 cells  
143 quantified every three days after treatment with a single control or *ADSL* siRNA in medium  
144 with serum (n=3, two-tailed *t* test \*\*\*\**p*<0.0001).  $\Delta$ PDL represent the difference in  
145 population doubling levels quantified through the formula described in materials and  
146 methods. **E.** Ki67 positive cells upon 96 hrs of silencing with control or *ADSL* smart pool  
147 siRNAs. Scale bar 10  $\mu$ m. (n=4, two-tailed *t*-test, \*\*\**p*<0.001). **F.** The percentage of p53  
148 positive cells following treatment with control or *ADSL* smart pool siRNAs were quantified  
149 in three independent experiments (n=3, two-tailed *t*-test, \**p*<0.05). **G.** Cell proliferation rate  
150 in RPE-1 wt and p53 knockout KO as in (C) was counted for 6 days. (n=3, two-tailed *t* test,  
151 \*\**p*<0.01, \**p*<0.05). **H.** EGFP and *ADSL*\*-EGFP stably expressing RPE-1 were transfected  
152 with a single control or *ADSL* siRNAs for 96 hrs and immunostained with anti-Ki67  
153 antibody. Scale bar=20  $\mu$ m. Quantification of Ki67 positive cells (n=3, one-way ANOVA  
154 test, *ns* not significant, \**p*<0.05, \*\**p*<0.01, \*\*\**p*<0.001). **I.** Quantification of RPE-1  
155 transfected with a single control or *ADSL* siRNA for 96 hrs in presence or absence of 60  
156  $\mu$ M nucleosides. Cells were fixed and immunostained with anti-Ki67 antibody. (n=3, one-  
157 way ANOVA test, *ns* not significant, \*\**p*<0.01, \**p*<0.05). **J.** Quantification of RPE-1 in the  
158 same conditions of (I) and immunostained with anti-p53 antibody (n=3, one-way ANOVA,  
159 *ns* not significant, \**p*<0.05). **K.** Quantification of p53 positive cells in *ADSL* depleted cells  
160 in the presence or absence of MRT00252040. (n=3, one-way ANOVA test, *ns* not  
161 significant, \**p*<0.05). **L.** Quantification of Ki67 positive cells in *ADSL*-depleted cells in the  
162 presence or absence of MRT00252040 (n=5, one-way ANOVA, *ns* not significant,  
163 \*\*\**p*<0.001). All graphs depict means  $\pm$  SD with individual values shown in circles.

164

## Figure S1

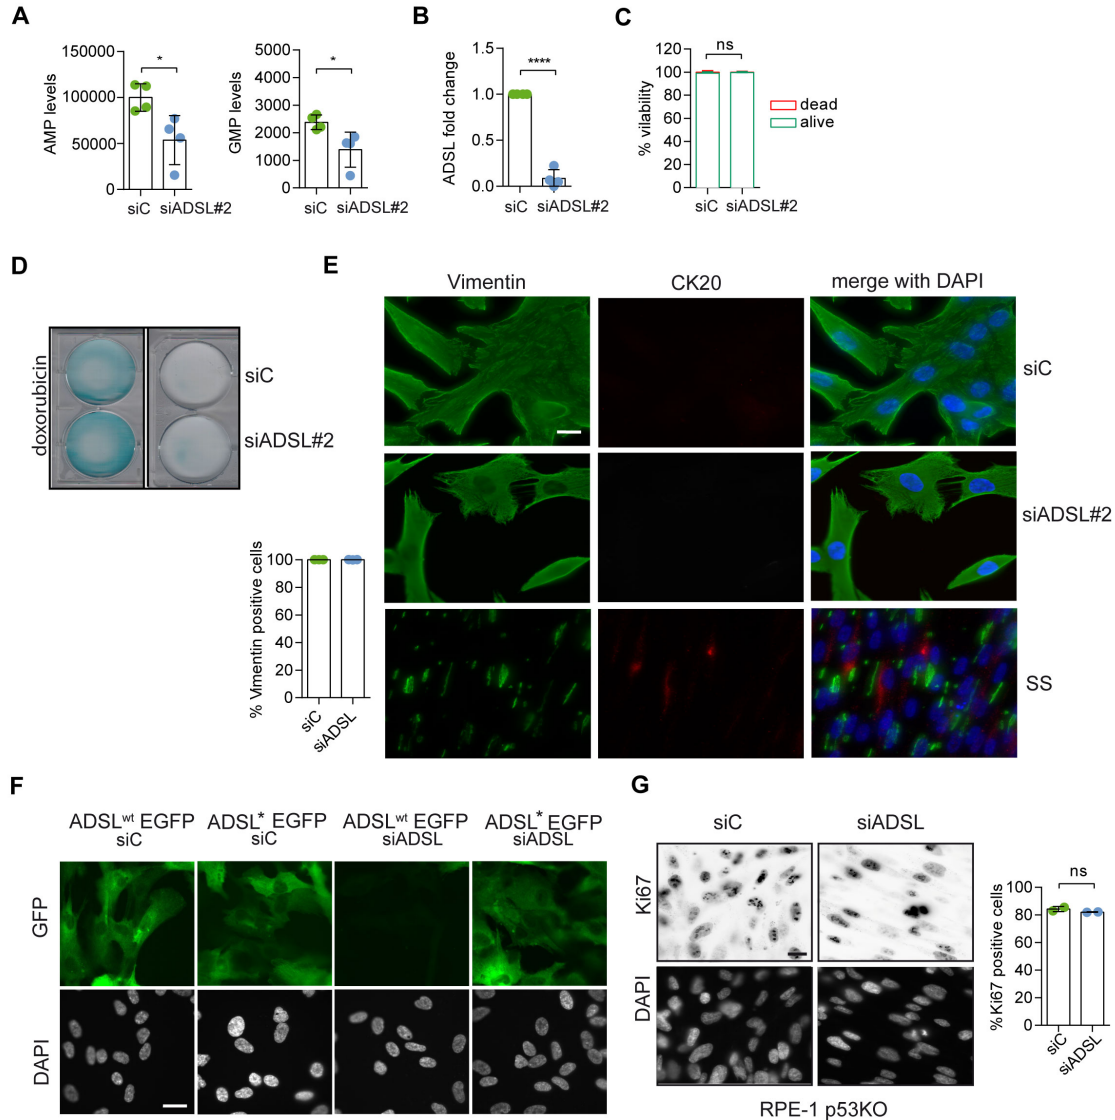

165

166

167

168

169

170

171

172

173

174

175

**Figure S1. ADSL depletion reduces purine levels but does not cause senescence or promote differentiation.** **A.** AMP and GMP levels in RPE-1 cells silenced with a single control or ADSL siRNA (n=4, two-tailed *t*-test, \**p*<0.05). **B.** qRT-PCR confirmed ADSL depletion with a single siRNA against *ADSL* (siRNA#2; n=4 in triplicate, two-tailed *t* test \*\*\*\**p*<0.0001). **C.** Quantification of cell viability by Trypan blue in RPE-1 cells transfected with single control or ADSL siRNAs. (n=5, two-tailed *t*-test, *ns* not significant). **D.**  $\beta$ -galactosidase assay in RPE-1 cells upon ADSL depletion as in (B). Doxorubicin was used as a positive control. **E.** Cells were transfected with a single control or ADSL siRNA (siADSL#2) for 96 hrs, fixed and stained against Vimentin and Cytokeratin-20 (CK20). Serum starvation (SS) for 144 hrs was used as positive control for differentiation and CK20

176 staining. Quantification of the percentage of cells positive for Vimentin is shown. No CK20  
177 positive cells were observed in ADSL depleted cells. Scale bar=20  $\mu$ m. **F.** Control of ADSL  
178 depletion and siRNA resistant mutant expression 96 hrs post ADSL depletion. Scale  
179 bar=20  $\mu$ m. **G.** Ki67 staining in RPE-1 p53 KO upon silencing with a single control or ADSL  
180 siRNA (siRNA#2; n=2, two-tailed *t*-test, *ns* not significant). Scale bar=20  $\mu$ m. All graphs  
181 depict means  $\pm$  SD with individual values shown in circles.

182

### 183 **ADSL depletion causes elevated DNA damage signaling**

184 Reduced levels of purine nucleotides in ADSL-depleted cells may cause replication stress  
185 and DNA damage, which could trigger p53 activation (15–17). We observed an increased  
186 number of cells with more than five 53BP1 foci per cell, indicative of DNA double strand  
187 break accumulation (Figures 2A). 53BP1 foci were reduced by treatment with a small  
188 molecule inhibitor for ATM (Figure 2B), indicating an active DNA damage response.  
189 Supplementation of cells with nucleosides suppressed the appearance of DNA double  
190 strand breaks detected by 53BP1 and  $\gamma$ H2AX staining (Figures 2C, D). In contrast, the  
191 PAICS inhibitor MRT00252040 did not rescue DNA double strand breaks (Figure 2E).  
192 These data indicate that ADSL depletion in cultured cells induces mild levels of DNA  
193 damage signaling that can be suppressed by nucleoside supplementation and that p53-  
194 dependent cell cycle exit is not solely a consequence of DNA damage signaling or purine  
195 metabolite accumulation.

196



## Figure 2

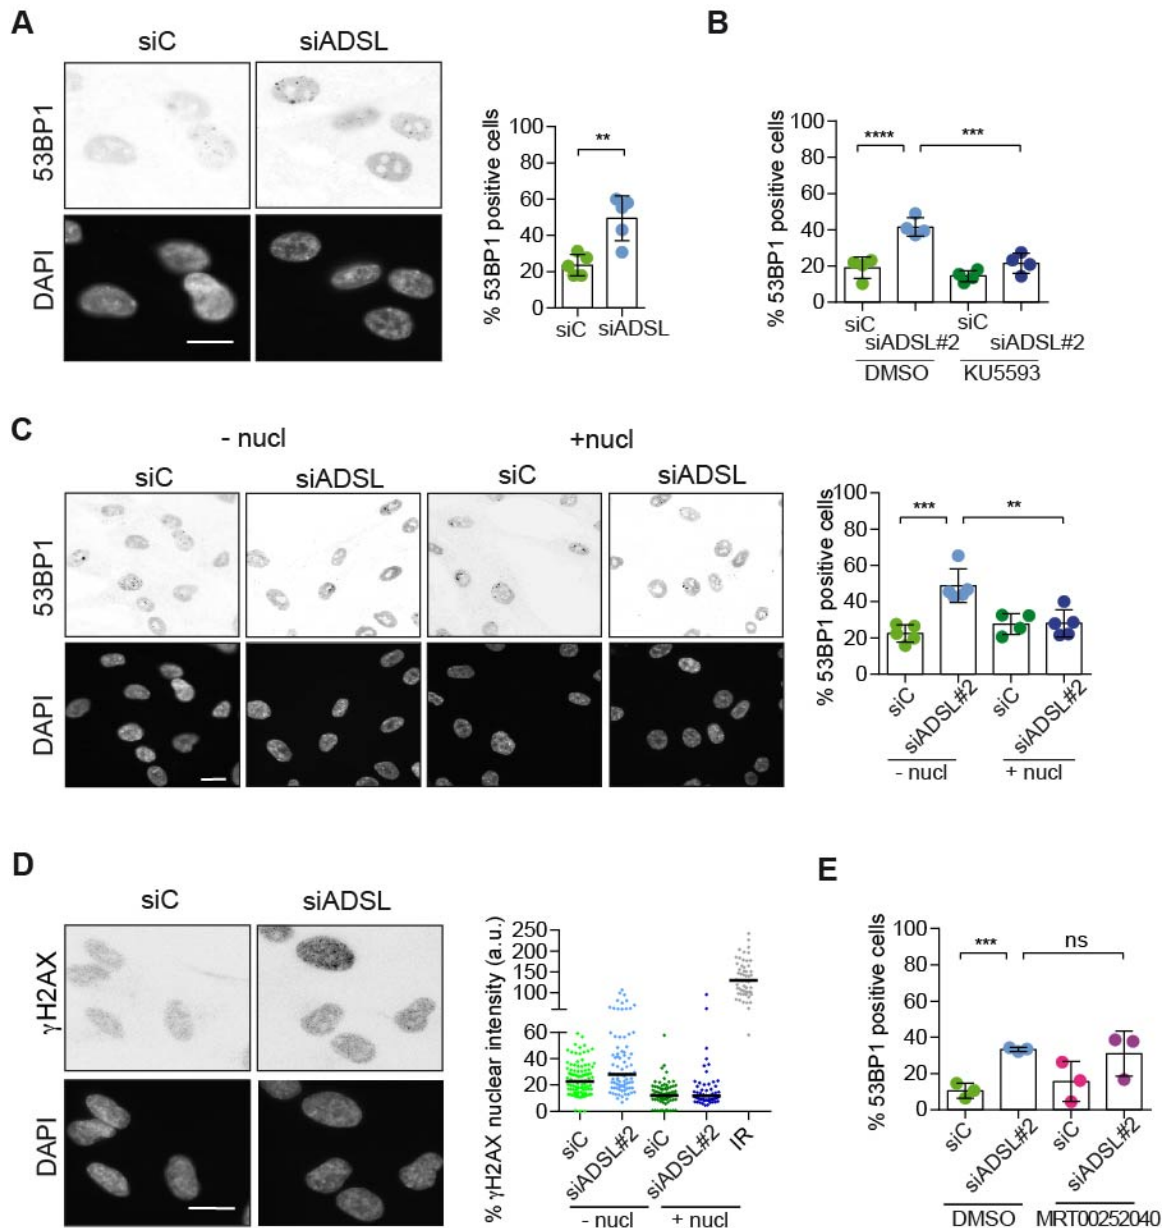

197

198

199

200

201

202

203

204

205

**Figure 2. ADSL depletion caused elevated DNA damage signaling.** **A.** RPE-1 were silenced for 96 hrs with a smart pool of ADSL siRNAs, fixed and immunostained with anti-53BP1 antibody. Scale bar=10  $\mu$ m. Quantification of positive cells that have more than 5 foci per cell (n=5, two-tailed *t*-test, \*\**p*<0.01). **B.** RPE-1 were silenced with a single control or ADSL siRNA with or without 5 mM ATM inhibitor (KU5593) (n=4, one-way ANOVA test, \*\*\*\**p*<0.0001, \*\*\**p*<0.001). **C.** Cells were silenced for 96 hrs, treated or not with 60  $\mu$ M nucleosides and stained for 53BP1. Scale bar=10  $\mu$ m. (n=5, one-way ANOVA test, \*\*\**p*<0.001, \*\**p*<0.01). **D.** RPE-1 treated as in (A) were fixed and stained for  $\gamma$ H2AX (H2AX

206 phosphorylated on Ser-139). Scale bar=10  $\mu$ m. 5 Gy X-ray irradiation (IR) was used as  
207 positive control. Quantification of one representative experiment of two that showed similar  
208 results is shown; median is indicated in black. After normalization to the average of the  
209 control (siC), one-tailed *t* test was used for statistical analysis of *n*=3 independent  
210 experiments: \**p*<0.05 was observed for siADSL (to siC), and for siADSL relative to  
211 siADSL+nucl. There is no statistical difference between siC and siC+nucl. **E.** RPE-1 were  
212 silenced in the presence or absence of 4  $\mu$ M MRT00252040, fixed and stained for 53BP1  
213 (*n*=4, one-way ANOVA test, *ns* not significant, \*\*\**p*<0.001). All bar graphs show means  $\pm$   
214 SD with individual values in circles.

215

### 216 **ADSL depletion impairs neurogenesis in the developing chicken neural tube**

217

218 Given the effects of ADSL depletion on cell growth and proliferation, we sought to examine  
219 the consequences of its loss *in vivo*. To this end, we used the chicken embryo system to  
220 examine the influence of ADSL depletion on nervous system development. We  
221 electroporated one side of the neural tube with plasmid expressing *GFP* as a transfection  
222 marker in combination with either control or ADSL shRNA vectors. After confirming  
223 efficient ADSL depletion (Figure 3A) we evaluated neurogenesis by staining with markers  
224 for proliferating neural progenitors (SOX2 positive) and post-mitotic neurons (ELAVL3/4  
225 positive). We found that in the ADSL depleted side, both cell populations were reduced  
226 when compared to the non-transfected side (Figure 3B) and that the size of the tissue was  
227 smaller, suggesting reduced growth and/or increased cell death. Staining for the apoptotic  
228 marker Cleaved-Caspase-3 revealed no notable differences, suggesting that this was not  
229 due to increased cell death (Figure S2A).

230

231 We then analyzed SOX2 and ELAVL3/4 staining only within the GFP-positive transfected  
232 cells and found that ADSL depletion increased the percentage of SOX2-positive  
233 progenitors relative to ELAVL3/4 positive neurons (Figure 3C, S2B). This suggested that  
234 reduced tissue growth was not due to premature differentiation but possibly due to a  
235 proliferation defect in the progenitor population. To study cell cycle progression in neural  
236 stem cells we performed FACS analysis of GFP-positive, ELAVL3/4 negative cells  
237 following electroporation of control and ADSL shRNA. We found that there was a slight  
238 increase in the G2/M population after ADSL depletion (Figure 3D). Further analysis of  
239 stained tissue sections showed that ADSL depletion caused a reduction in the fraction of  
240 cells that incorporated EdU and an increase in the fraction of cells positive for the G2/M

241 marker phosphorylated Histone H3-Ser10 (pH3S10) (Figure 3E). We separated the  
242 pH3S10 positive cells into two populations; G2 cells, identified by punctate pH3S10  
243 staining, and mitotic cells, displaying broadly distributed pH3S10 staining. This revealed  
244 that only the G2 fraction of cells was increased by ADSL depletion, indicating that ADSL  
245 depletion caused a specific delay in G2 phase, rather than during mitosis (Figure 3F).  
246 Together our data indicate that ADSL depletion leads to a mild induction of DNA damage  
247 signaling and impaired cell cycle progression. *In vivo*, this manifests as reduced cellularity  
248 in the developing brain, without a clear induction of cell death or senescence.

**Figure 3**

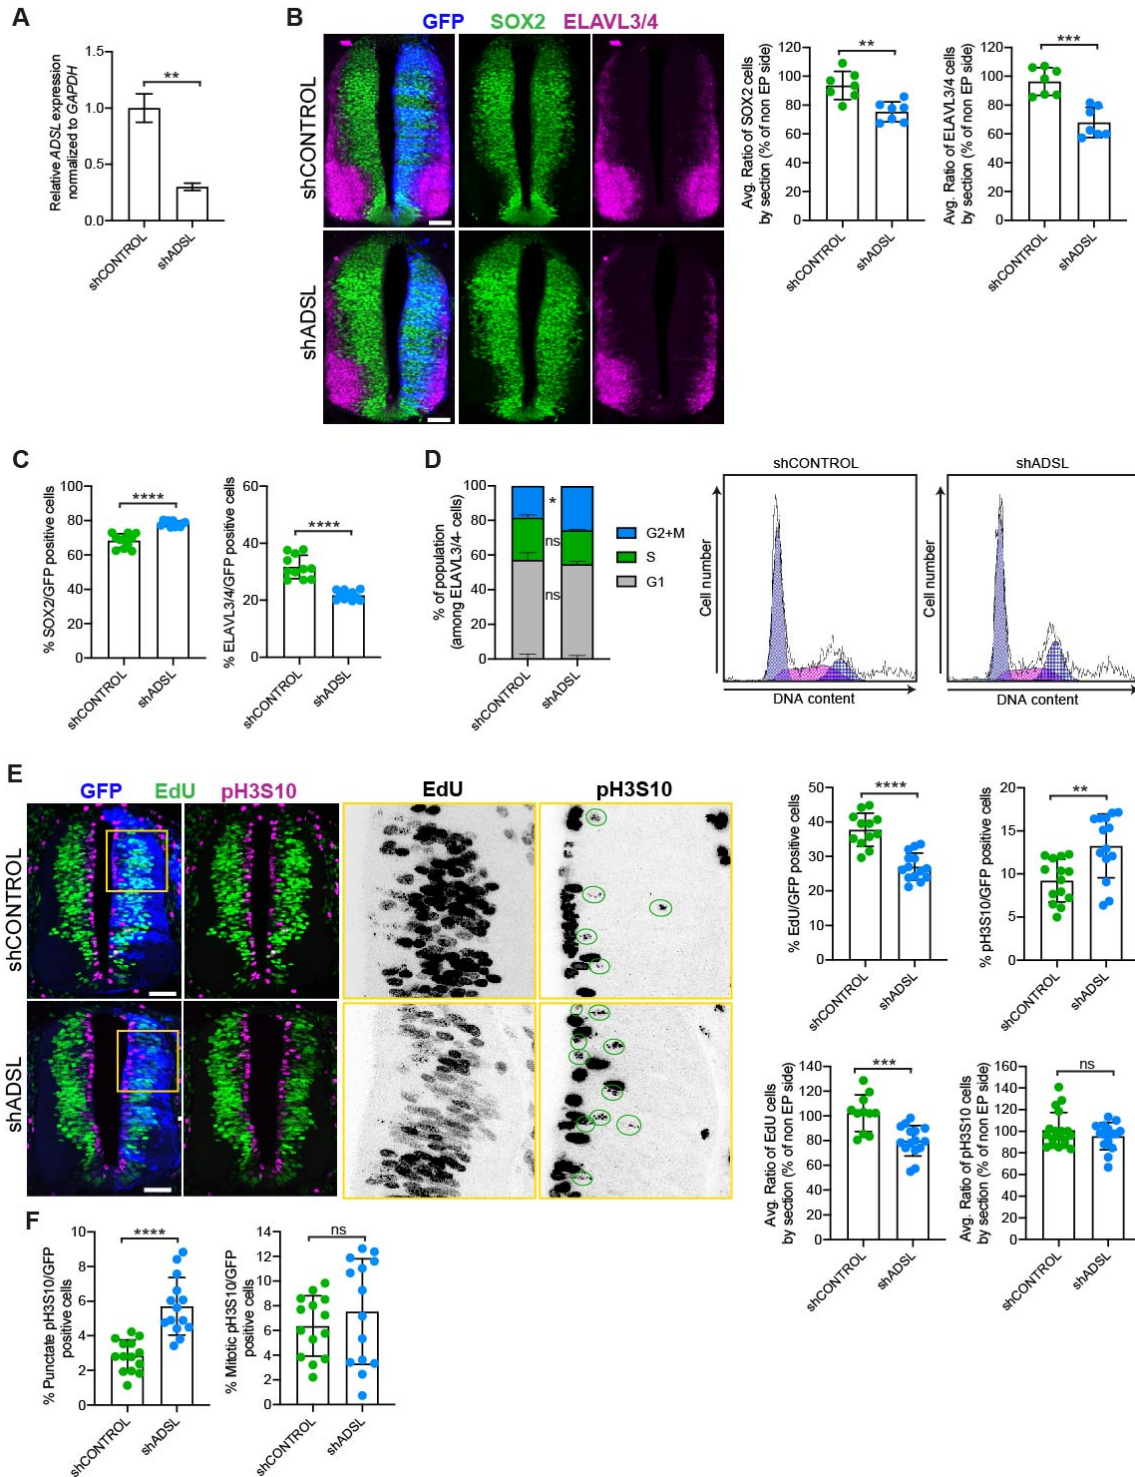

249

250

251

252

253

**Figure 3. ADSL depletion causes neurodevelopmental delay in the chicken neural tube.** **A.** mRNA levels of *ADSL* and *GAPDH* were measured by qRT-PCR in chicken embryonic fibroblasts (CEFs) transfected for 24 hrs with shCONTROL and shADSL to confirm knockdown efficiency (n=3, two-tailed *t*-test, \*\**p*<0.01). **B.** Transverse sections of

254 HH12 chicken neural tubes 48 hrs post electroporation (hpe) with shCONTROL and  
255 shADSL plasmids and stained with antibodies against SOX2 (green) and ELAVL3/4  
256 (magenta). Transfection was detected by GFP (blue). Scale bar=50  $\mu$ m. Average ratio of  
257 neural stem cells (NSCs, SOX2+) 48 hpe with shCONTROL and shADSL obtained by  
258 comparing the mean number of SOX2+ cells on the electroporated and non electroporated  
259 side (n=7 embryos, two-tailed t-test, \*\*p<0.01). Average ratio of cells differentiated into  
260 neurons (ELAVL3/4) at 48 hpe with shCONTROL and shADSL obtained by comparing the  
261 mean number of ELAVL3/4 positive cells on the electroporated and the non electroporated  
262 side (n=7 embryos, two-tailed t-test, \*\*\*p<0.001). **C.** Percentage of electroporated cells  
263 indentified as NSCs (SOX2) or neurons (ELAVL3/4) 48hpe with shCONTROL and shADSL  
264 (n=11 embryos, two-tailed t-test, \*\*\*\*p<0.0001). **D.** The cell cycle profiles of NSCs  
265 (GFP+/ELAVL3/4-) obtained by FACS 48 hpe with shCONTROL and shADSL into HH12  
266 chicken neural tubes. The mean of two independent experiments is shown in the left panel.  
267 6-8 embryos per condition were used for each experiment. Two-tailed t-test was used for  
268 statistical analysis of n=2 independent experiments, *ns* not significant, \*p<0.05 Cell cycle  
269 profiles of a representative experiment are shown in the right panels. **E.** Transverse  
270 sections of HH12 chicken neural tubes 48 hpe with shCONTROL and shADSL plasmids,  
271 and stained with EdU (green) and an antibody against pH3S10 (magenta). Transfection  
272 was detected by GFP (blue). Scale bar=50  $\mu$ m. Areas indicated in yellow are amplified in  
273 the right panels showing separated channels in black. Green circles in pH3S10  
274 amplification show punctate pH3S10 positive cells. Percentage of transfected cells  
275 indentified as EdU 48 hpe with shCONTROL and shADSL (n=12 embryos (shCONTROL)  
276 and 14 embryos (shADSL), two-tailed t-test, \*\*\*\*p<0.0001). Percentage of pH3S10 among  
277 the GFP+ cell population 48 hpe with shCONTROL and shADSL (n=14 embryos, two-  
278 tailed t-test, *ns* not significant, \*\*p<0.01, \*\*\*\*p<0.0001). Average ratio of EdU and pH3S10  
279 positive cells 48 hpe of shCONTROL and shADSL plasmids, obtained by comparing the  
280 mean number of EdU cells on the electroporated and the non electroporated side (EdU:  
281 n=11 embryos (shCONTROL), 15 embryos (shADSL), two-tailed t-test, \*\*\*p<0.001;  
282 pH3S10: n=18 embryos (shCONTROL), 15 embryos (shADSL), two-tailed t-test, *ns* not  
283 significant). **F.** Percentage of punctate pH3S10 (G2 phase) and mitotic pH3S10 (M phase)  
284 among the GFP+ cell population 48 hpe of shCONTROL and shADSL plasmids (n=14  
285 embryos, two-tailed t-test, *ns* not significant, \*\*\*\*p<0.0001). Bar graphs show means  $\pm$   
286 SD.

## Figure S2

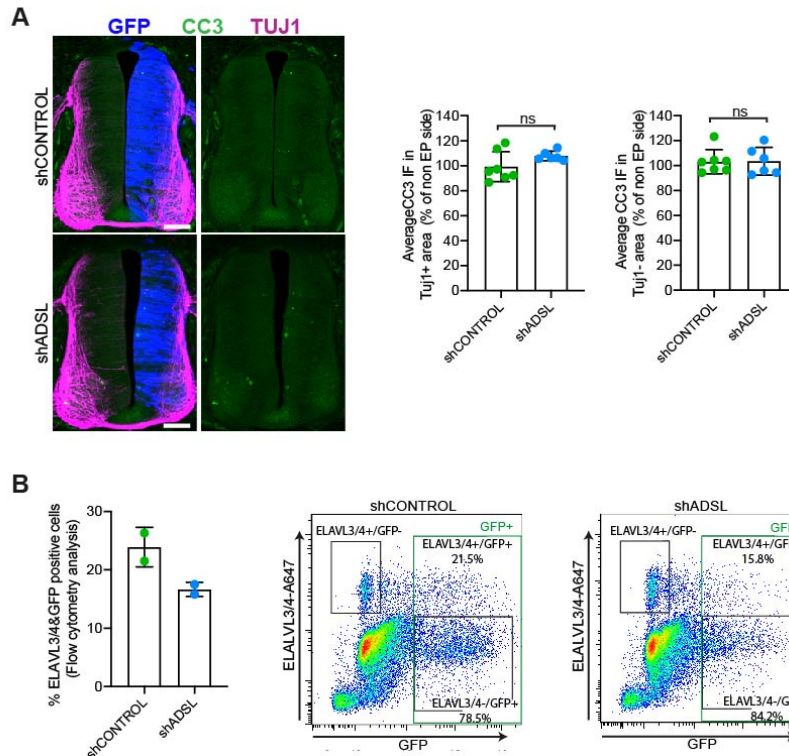

287

288

289

290

291

292

293

294

295

296

297

298

299

### 300 SAICAr-dependent ciliogenesis defects following ADSL depletion

301

302

303

304

305

**Figure S2. Lack of cell death or increased differentiation in developing ADSL-depleted chicken neural tubes.** **A.** Representative transverse neural tube sections and quantification of mean Cleaved-Caspase-3 (CC3; green) immunofluorescence intensity obtained by comparing mean CC3 intensity on TUJ1- or TUJ1+ area (magenta) on the electroporated side (GFP area, blue) with the respective area on the non electroporated side after 48 hpe with shCONTROL and shADSL (n=7 embryos (shCONTROL) and 6 embryos (shADSL), two-tailed t-test, *ns* not significant). Scale bar=50  $\mu$ m. **B.** Rate of differentiation was analyzed by FACS after 48 hpe into HH12 neural tubes with shCONTROL and shADSL. 6-8 embryos per condition were used for each experiment. The mean of two independent experiments are shown in the left panel. Dot plots in right panels representing ELAVL3/4 intensity versus GFP intensity of a representative experiment.

### SAICAr-dependent ciliogenesis defects following ADSL depletion

As there are non-cycling cells in the brain and since ADSL depletion caused cell cycle exit in RPE-1 cells, conditions frequently accompanied by ciliogenesis, we tested the ability of control and ADSL depleted RPE-1 cells to assemble cilia. Following treatment with siRNA, cells were serum-starved for 48 hours and analyzed by immunofluorescence microscopy. Ki67 staining confirmed that most of the cells in both conditions exited the cell cycle (Figure

306 4A). We next examined ciliogenesis by staining with antibodies for ARL13B to label cilia  
307 and pericentrin (PCNT) a marker of centrosomes. Fewer cells treated with the ADSL  
308 siRNA pool had cilia and the cilia that were present were shorter when compared to  
309 controls (Figure 4B). We also observed shorter cilia upon depletion with single siRNAs  
310 (Figure S3A). To exclude the possibility that ciliogenesis was simply delayed, we  
311 quantified the number of ciliated cells 72 hrs after serum starvation and observed a similar  
312 defect (Figure S3B). Defective ciliogenesis was rescued by expression of an siRNA  
313 resistant cDNA (ADSL\*) but not by nucleoside supplementation (Figures 4C, D). Inhibition  
314 of the DNPS pathway with methotrexate (MTX) had no effect on ciliogenesis in control  
315 cells (Figure S3C) but rescued both the number of ciliated cells and cilia length when  
316 ADSL was depleted (Figure S3D).

317  
318 Since ciliogenesis was rescued by MTX, which inhibits multiple steps in the DNPS  
319 pathway up and downstream of ADSL, but not by nucleoside supplementation, we next  
320 examined the potential role of SAICAr accumulation. Following ADSL depletion, we  
321 treated cells with the inhibitor MRT00252040 to specifically inhibit PAICS(14). This  
322 rescued ciliogenesis, as number and length of cilia were similar in control and ADSL-  
323 depleted cells (Figure 4E). Consistent with this, treatment of cells with SAICAr  
324 recapitulated the ciliogenesis defect observed in ADSL depleted cells (Figures 4F, G). To  
325 exclude indirect effects on ciliogenesis by DNA damage and resulting p53 activation, we  
326 repeated the experiment in p53 KO cells. While the overall percentage of ciliated cells was  
327 slightly lower in p53 KO cells, depletion of ADSL recapitulated the result obtained in RPE-  
328 1 wt, a reduction in ciliated cells compared to controls (Figure S3E). We concluded that  
329 SAICAr accumulation caused by ADSL depletion impaired the generation of primary cilia.

**Figure 4**

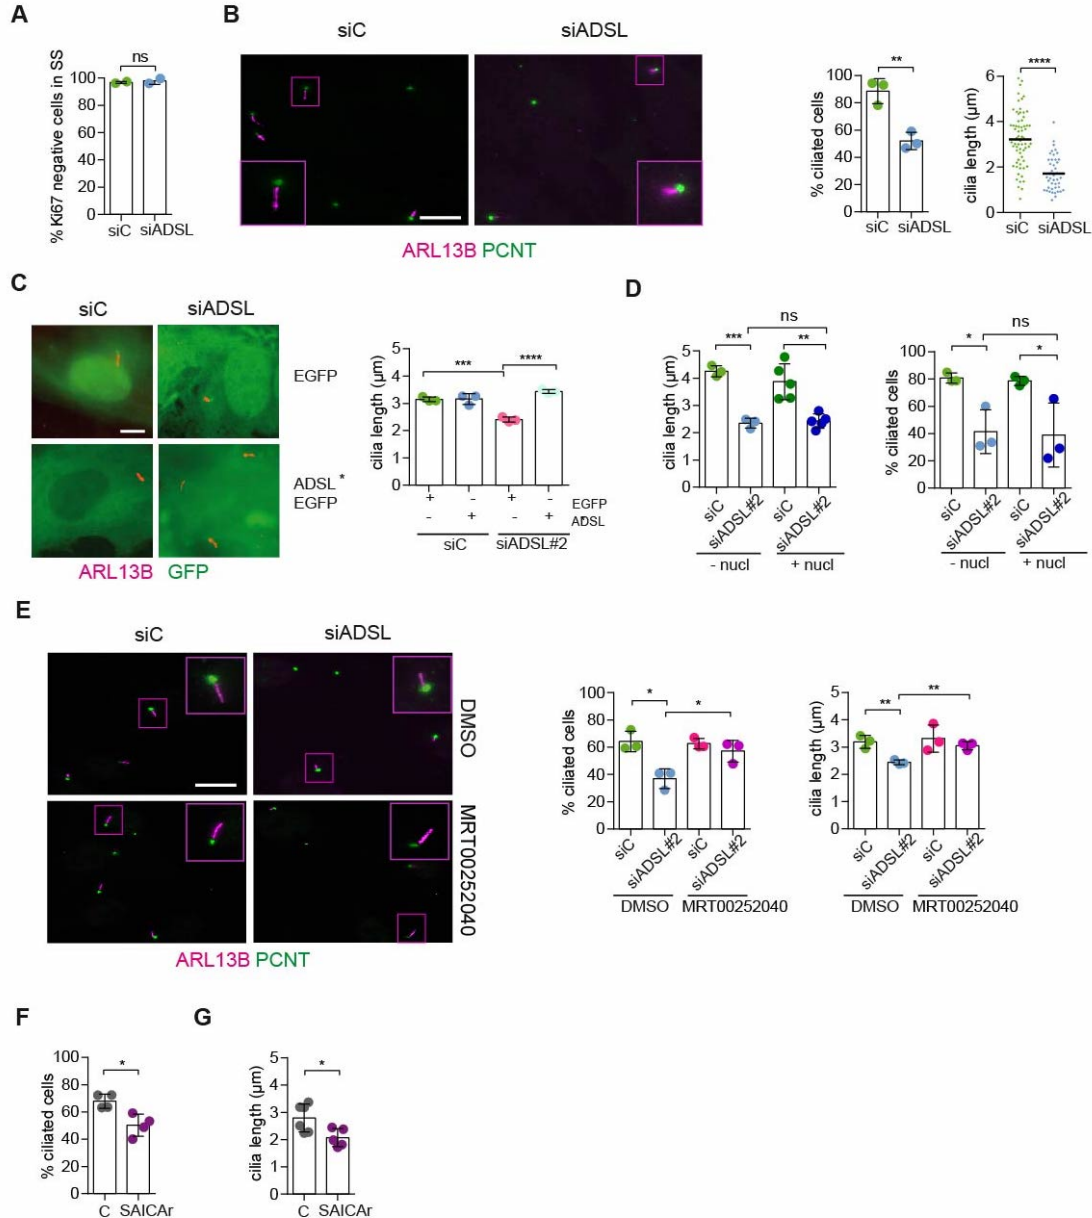

330

331 **Figure 4. SAICAr-dependent ciliogenesis defects following ADSL depletion.**

332 1 were transfected with control and ADSL smart pool siRNAs. After 96 hrs cells were

333 serum starved for 48 hrs to induce ciliogenesis followed by staining against Ki67 (n=2,

334 two-tailed *t*-test, *ns* not significant). **B.** Ciliated cells silenced as in **(A)** were stained for

335 ARL13B (magenta) and PCNT (green). Scale bar=10  $\mu\text{m}$ . Magenta squares show

336 enlargements of the areas. Graphs show quantification of ciliated cells and cilia length

337 (line indicates median) (n=3, two-tailed *t*-test, \*\*\*\*p<0.0001, \*\*p<0.01). **C.** EGFP and

338 ADSL\*-EGFP stably expressing RPE-1 were silenced for 96 hrs with control and a single



339 ADSL siRNA, serum starved for 48 hrs, fixed and stained for ARL13B (red). Scale bar=5  
340  $\mu\text{m}$ . Graphs summarizes three experiments (one-way ANOVA, *ns* not significant,  
341 \*\*\* $p < 0.001$ , \*\* $p < 0.01$ , \* $p < 0.05$ ). **D.** RPE-1 silenced with a single ADSL siRNA (siADSL#2)  
342 for 96 hrs in the absence or presence of 60  $\mu\text{M}$  nucleosides. Cilia frequency and cilia  
343 length were quantified (mean  $\pm$  SD of  $n=3$  siC and siADSL,  $n=5$  for siC and siADSL with  
344 nucleosides, one-way ANOVA test, *ns* not significant, \*\*\* $p < 0.001$ , \*\* $p < 0.01$ , \* $p < 0.05$ ). **E.**  
345 RPE-1 cells were ADSL-depleted, treated or not with MRT00252040 and serum starved,  
346 and then immunostained for ARL13B (magenta) and PCNT (green). Scale bar=10  $\mu\text{m}$   
347 ( $n=3$ , one-way ANOVA, \* $p < 0.05$ ). Cilia frequency and cilia length were quantified (one-  
348 way ANOVA test, \*\* $p < 0.01$ ). **F.** Quantification of the cilia frequency in control and SAICAR-  
349 treated cells ( $n=4$ , two-tailed *t* test, \* $p < 0.05$ ). **G.** Cilia length measurement of cells treated  
350 as in (F) ( $n=5$ , two-tailed *t* test, \* $p < 0.05$ ).  
351

**Figure S3**

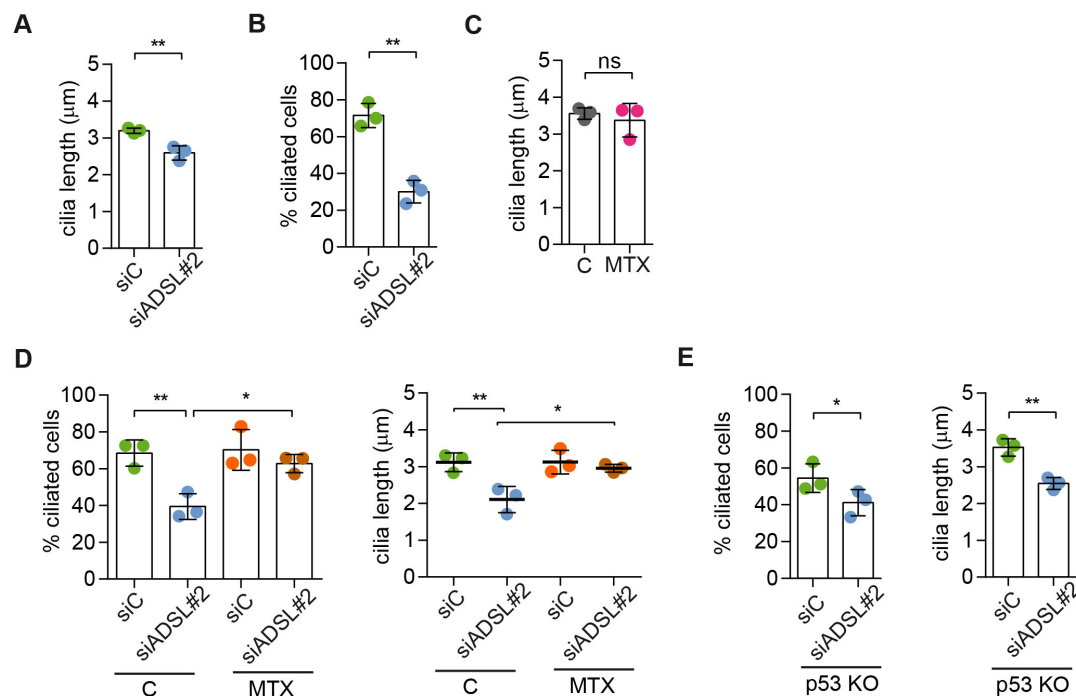

352

353 **Figure S3. ADSL-depletion impairs ciliogenesis that can be rescued by MTX**  
354 **treatment.** **A.** Quantification of cilia length in RPE-1 cells transfected with a single control  
355 or ADSL siRNA ( $n=3$ , two-tailed *t*-test, \*\* $p < 0.01$ ). **B.** Quantification of cilia frequency in  
356 RPE-1 silenced as in (A) and serum starved for 72 hrs. ( $n=3$ , two-tailed *t*-test \*\* $p < 0.01$ ).

357 **C.** Quantification of cilia length in RPE-1 treated for 24 hrs with 5  $\mu$ M MTX (DHFR inhibitor)  
358 (n=3, two-tailed *t*-test, *ns* not significant). **D.** Quantification of cilia frequency and cilia  
359 length in RPE-1 transfected with single control and ADSL siRNAs treated or not with 5  $\mu$ M  
360 MTX for 24 hrs before serum starvation (n=3, one-way ANOVA, \*\*p<0.01, \*p<0.05). **F.**  
361 Quantification of the number of ciliated cells and cilia length in RPE-1 p53KO upon ADSL  
362 depletion (n=3, two-tailed *t*-test, \*\*p<0.01, \*p<0.05).

363

#### 364 **SAICAr impairs CP110 removal**

365 To understand the origin of the ciliogenesis defect, we examined centriole configurations,  
366 since mother centrioles, after conversion to basal bodies, template formation of the  
367 primary cilium. Centrosomes in ADSL depleted cells had normal levels of PCNT and  
368 normal number of centrioles (Figure 5A and S4A). However, we found that the removal of  
369 CP110 from the mother centriole, a key step in early ciliogenesis, was impaired in serum-  
370 starved, ADSL depleted cells. Compared to controls a larger number of ADSL depleted  
371 cells contained centrosomes with 2 CP110 foci (Figure 5B). This could be phenocopied  
372 by administration of SAICAr and it was rescued by PAICS inhibition (Figures 5B, C). To  
373 determine if the retention of CP110 could underlie the phenotype, we co-depleted CP110  
374 with ADSL using three different siRNAs. All three siRNAs silenced CP110 as verified by  
375 western blot (Figure S4D) and partially depleted CP110 at centrioles (Figure S4B). In non-  
376 serum-starved conditions CP110 siRNA treated cells had fewer than the two centriolar  
377 CP110 foci typically observed in control cells (Figure S4B). Remaining centriolar signal  
378 was associated with daughter centrioles (distal to the base of the cilium in ciliated cells;  
379 Figure S4C). Co-depletion of CP110 with ADSL rescued the ciliogenesis defect (Figures  
380 5D). These data demonstrated a SAICAr-dependent impairment of primary ciliogenesis  
381 that can be rescued by CP110 depletion or inhibition of PAICS, but not by restoration of  
382 purine levels.

## Figure 5

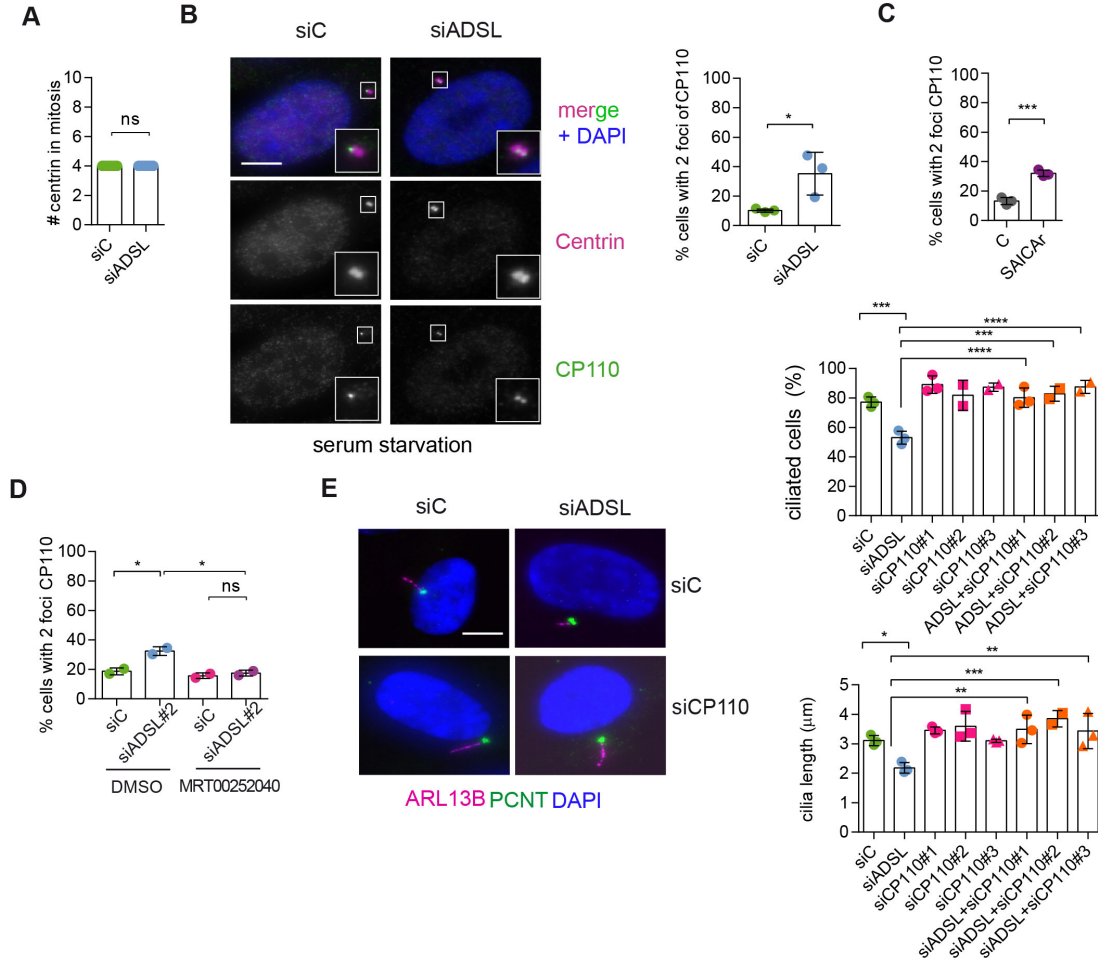

383

384 **Figure 5. SAICAr impairs CP110 removal.** **A.** Quantification of the number of Centrin  
 385 foci present in mitotic RPE-1 cells transfected with control or ADSL smart pool siRNAs for  
 386 96 hrs (n=2, two-tailed *t* test, *ns* not significant). **B.** ADSL silenced cells and controls were  
 387 stained for Centrin (magenta) and CP110 (green). Nuclei are shown by DAPI (blue). Graph  
 388 depicts the number of ciliated cells with two CP110 foci per centrosome. (n=3, one-way  
 389 ANOVA, *ns* not significant, \**p*<0.05). **C.** Cells mock or treated with SAICAr were processed  
 390 and analyzed as described in panel (B) (n=3, two-tailed *t*-test, \*\*\**p*<0.001). **D.** RPE-1  
 391 depleted with ADSL and control siRNAs were treated with vehicle or MRT00252040 and  
 392 stained as in (B,C). Graph depicts the percentage of cells presenting 2 CP110 foci per  
 393 centrosome (n=2; one way ANOVA, \**p*<0.05). **E.** RPE-1 depleted with ADSL and/or  
 394 CP110 (silenced for 24 hrs with three different siRNAs) were serum starved for 48 hrs,  
 395 fixed and stained for ARL13B (magenta) and PCNT (green). Graphs show number of  
 396 ciliated cells (n=3 for siC, siADSL, siCP110#1, siADSL+siCP110#1; n=2 for siCP110#2,

397 siCP110#3, siADSL+siCP110#2 and siADSL+siCP110#3, one-way ANOVA,  
398 \*\*\*\* $p < 0.0001$ , \*\*\* $p < 0.001$ ) and cilia length ( $n=3$ , one-way ANOVA \*\*\* $p < 0.001$ , \*\* $p < 0.01$ ,  
399 \* $p < 0.05$ ). All graphs show means  $\pm$  SD with individual values shown in circles.  
400

**Figure S4**

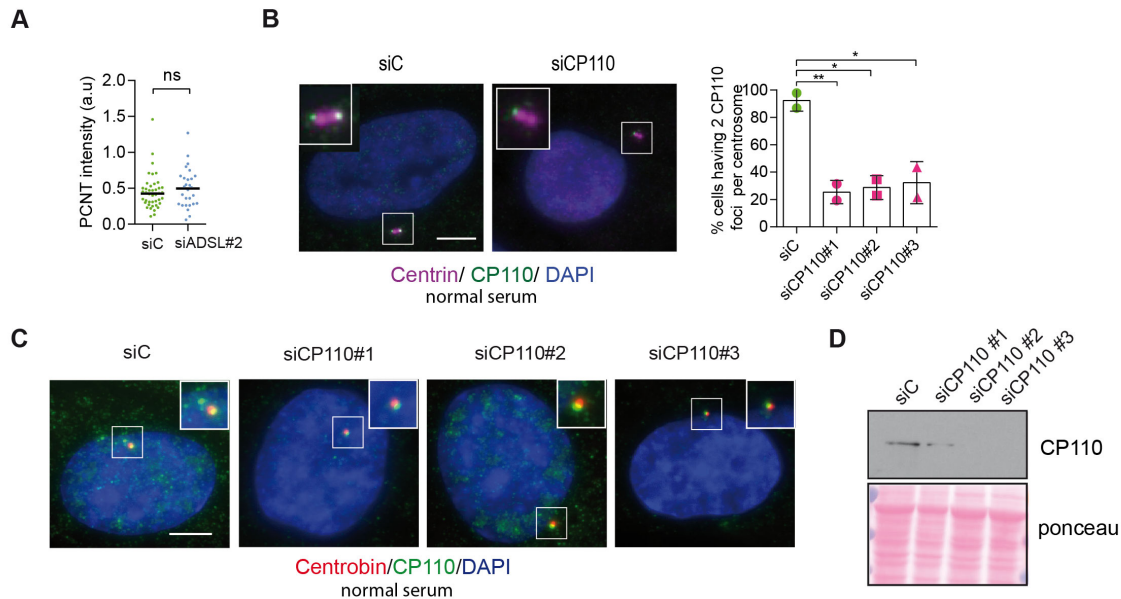

401  
402 **Figure S4. Analysis of Pericentrin accumulation and CP110 depletion.** **A.**  
403 Quantification of PCNT intensity upon ADSL depletion with a single siRNA#2 ( $n=2$ , two-  
404 tailed  $t$  test applied,  $ns$  not significant; median is shown). **B.** CP110 presence in both  
405 centrioles (stained by anti-Centrin antibody, in magenta) upon 24 hrs of CP110 depletion  
406 in normal serum (10%) conditions. Quantification of centrioles presenting two foci per  
407 centrosome in control and in CP110 depleted cells with three different siRNAs ( $n=3$ , one-  
408 way ANOVA test \*\* $p < 0.01$ , \* $p < 0.05$ ). Scale bar= $5\mu\text{m}$ . **C.** CP110 foci (in green) colocalizing  
409 with Centrobins (marker of daughter centriole, in red) upon CP110 depletion for 24 hrs in  
410 normal serum (10%). Three different siRNAs were used. Scale bar= $5\mu\text{m}$ . **D.** Western blot  
411 to confirm CP110 depletion after 24 hrs of silencing.

412

### 413 **Depletion of Adsl in zebrafish results in developmental defects**

414 To test whether ADSL deficiency caused ciliary defects *in vivo*, we employed a zebrafish  
415 model. As CRISPR/Cas9-mediated gene knockout did not yield viable mutants, we used  
416 two different antisense morpholino oligonucleotides (MO) to deplete Adsl in zebrafish

417 embryos. *Adsl* is ubiquitously expressed at early embryonic stages and, by the 18-somite  
418 stage, highly expressed in several areas of the developing brain, including the midbrain  
419 and mesencephalon (Figure S5A-L). Antibody staining demonstrated expression of *Adsl*  
420 in neurons, which was abolished upon injection of either MO (Figure S6). Examination of  
421 embryo morphology 48 hrs post fertilization (hpf) revealed pericardial edema, kinked tail,  
422 hydrocephalus and pinhead (microcephaly) phenotypes (Figure 6A-E). Defects in head  
423 size, which are consistent with the clinical presentation of ADSLD patients, were further  
424 corroborated by staining for skull formation that is coordinated with brain development.  
425 Alcian blue staining showed that nearly 50% of the *Adsl* depleted embryos exhibited weak  
426 or absent staining (Figure 6F). Defects in skull formation could be largely rescued by  
427 zebrafish *Adsl* or human *ADSL* expression but not expression of a human *ADSL* R426H  
428 mutant, the most frequently observed ADSLD mutation (Figure 6F). Examination of DNA  
429 damage signaling in the developing neural tube revealed an increase in  $\gamma$ H2AX positive  
430 cells. Similar to what was observed in RPE-1 cells, treatment with nucleosides suppressed  
431 DNA damage signaling (Figure 6G). These data demonstrated that *Adsl* depletion strongly  
432 impaired normal zebrafish development, leading to DNA damage that could be  
433 suppressed with nucleoside supplementation and several phenotypes consistent with  
434 ciliary defects.

**Figure 6**

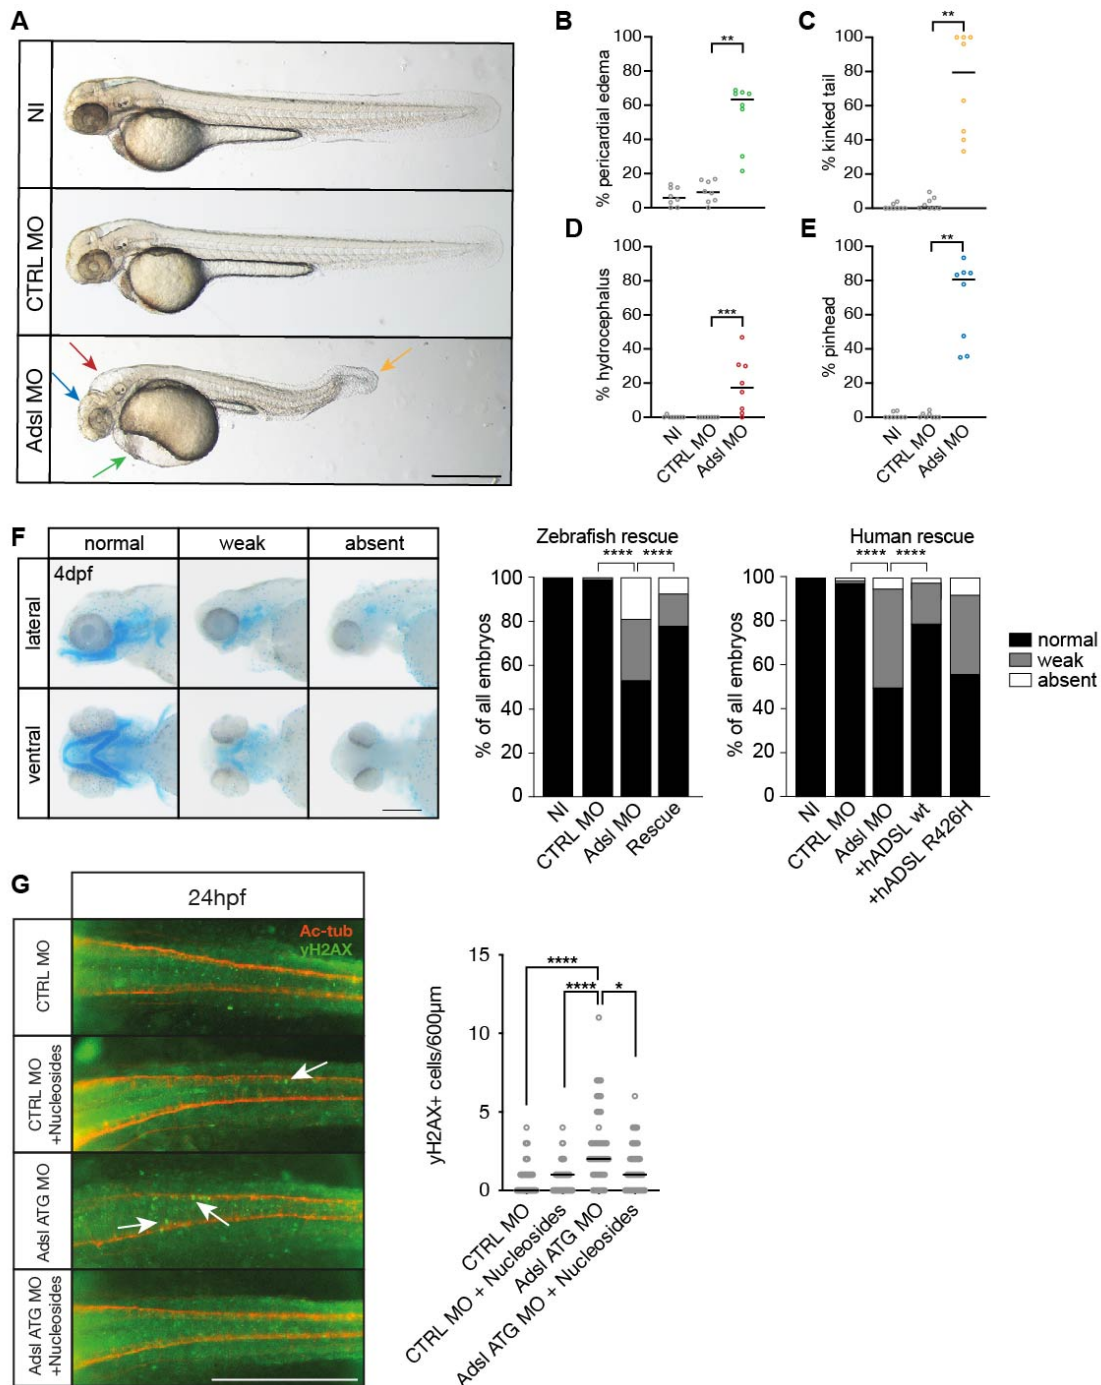

435

436

437

438

439

440

**Figure 6. Depletion of Adsl in zebrafish causes developmental phenotypes and DNA damage signaling.** **A.** Live images of 48 hpf zebrafish embryos showing pericardial edema (green arrow), kinked tail (yellow arrow), hydrocephalus (red arrow) and pinhead (blue arrow). NI (uninjected controls), CTRL MO (embryos injected with a standard control MO), Adsl ATG MO (injected with a translation blocking MO against Adsl). Scale

441 bar=500 $\mu$ m. **B-E.** Quantification of the percentage of embryos developing the indicated  
442 phenotypes. For (B-E) Each circle indicates one experiment. Data from 8 experiments with  
443 311 embryos (NI), 275 (CTRL MO), 227 (Adsl ATG MO) is shown. Kruskal-Wallis test with  
444 Dunn's multiple comparison. Dashes show median. \*\*p=0.0042 (pericardial edema),  
445 \*\*p=0.0032 (kinked tail), \*\*p=0.0011 (pinhead), \*\*\*p=0.0005 (hydrocephalus). **F.** Adsl  
446 depleted zebrafish display skull formation defects. Cartilage staining of zebrafish embryos  
447 (4 days post fertilization, dpf) with Alcian blue. Embryos were classified according to the  
448 severity of their phenotype in normal staining, weak staining or absent cartilage. Lateral  
449 and ventral view. Cartilage formation could be rescued by co-injection of capped mRNA  
450 encoding zebrafish Adsl. 6-8 experiments with a total of 178 embryos (NI), 133 (CTRL  
451 MO), 169 (Adsl ATG MO), 123 (Rescue). Injection of mRNA encoding human wt ADSL,  
452 but not the R426H ADSLD variant, restores cartilage formation in embryos. 4 experiments  
453 with a total of 116 embryos (NI), 81 (CTRL MO), 80 (Adsl ATG MO), 91 (+ *hADSL wt*) and  
454 89 (+ *hADSL R426H*). Two-tailed Fisher's exact test; \*\*\*\* p<0.0001. Scale bar=200 $\mu$ m. **G.**  
455 Immunofluorescence staining of the neural tube (dorsal view) of control and Adsl depleted  
456 embryos 24 hpf for  $\gamma$ H2AX (green) and Acetylated-tubulin (Ac-tub: red). Treatment with  
457 60mM nucleosides was carried out in indicated samples. Experiments with 45 embryos  
458 per treatment are shown, dashes indicate median. Data were analyzed by using Kruskal-  
459 Wallis test with Dunn's correction. \*p<0.05, \*\*\*\*p<0.0001. Scale bar=300 $\mu$ m. Unless  
460 indicated, comparisons are not significant.  
461

Figure S5

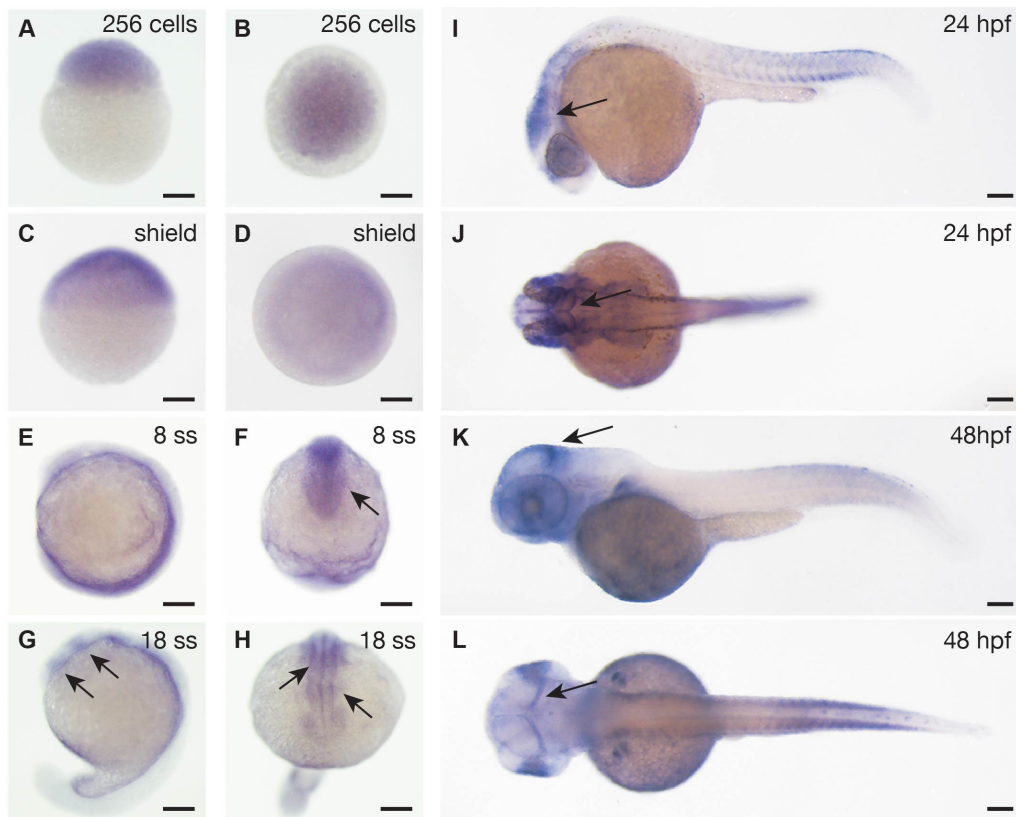

462

463

464

465

466

467

468

469

470

471

472

**Supplemental Figure S5. *Adsl* expression in zebrafish development.** Whole mount *in situ* hybridization for detection of *adsl* expression during zebrafish development. All scale bars=100  $\mu$ m. **A-D.** *adsl* is ubiquitously expressed. **E-F.** *adsl* is expressed in the anterior part of the embryo including the optic primordium (arrow in F). **G-H.** At 18 somite stage (ss) *adsl* is expressed in the developing midbrain and hindbrain (arrows). **I-J.** *adsl* is expressed in several areas of the brain including the mesencephalon (arrows). **K-L.** *adsl* is expressed in several areas of the brain including the midbrain hindbrain boundary (arrows). **D, F, H, J, L.** dorsal views.



## Figure S6

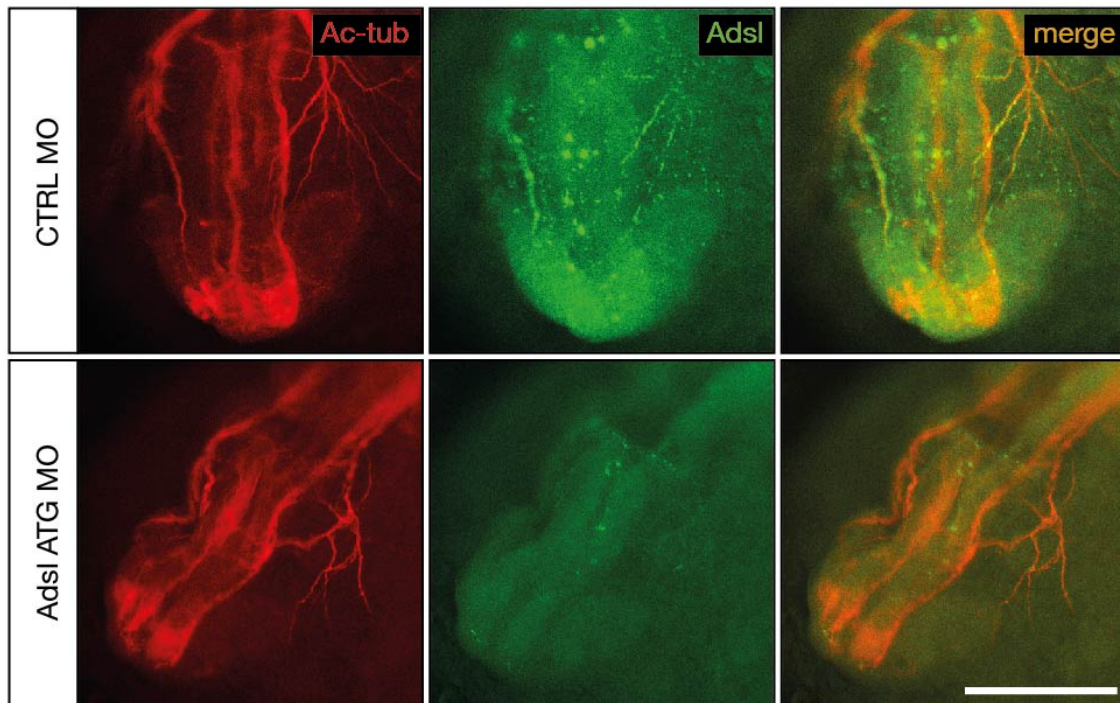

473

474 **Supplemental Figure S6. Test of knockdown efficiency.** Whole mount antibody  
475 staining for acetylated tubulin (red) to visualize neurons and Adsl (green) in 24 hpf  
476 zebrafish embryos. Injection of ATG morpholino resulted in very weak expression of Adsl  
477 along axons. Images show anterior views of zebrafish heads. Scale bar=200  $\mu$ m.

478

### 479 **Adsl depletion impairs ciliogenesis in zebrafish**

480 As the observed phenotypes were potentially indicative of defects in cilium function, we  
481 examined heart looping by staining for cardiac myosin light chain 2 (*cmcl2*) mRNA. Adsl  
482 depleted embryos showed higher frequencies of defects, including inverse looping and to  
483 a lesser extent no loops (Figure 7A). Inverse heart looping may be indicative of laterality  
484 impairment (situs inversus) that can arise due to ciliary defects. To corroborate this  
485 possibility, we examined liver placement by staining for angiopoietin-like 3 (*angptl3*). A  
486 significant increase in inverse liver placement was observed in Adsl depleted embryos  
487 compared to controls, supporting a general defect in laterality (Figure 7B). To further  
488 investigate the laterality defects, we examined left-right asymmetry at the 20-somite stage,  
489 staining for the mRNA of the left lateral plate mesoderm marker *southpaw* (*spaw*).  
490 Consistent with the altered distribution of *cmcl2* and *angptl3*, asymmetric *spaw* mRNA  
491 localization was changed in about 40% of Adsl depleted embryos. Most of these embryos  
492 showed symmetric patterning and a smaller fraction no or only weak staining. The correct

493 asymmetric distribution of *spaw* mRNA could be largely restored by expression of mRNA  
494 encoding zebrafish *Adsl* (Figure 7C).

495

496 To test if impaired laterality may involve ciliary defects, we examined the Kupffer's vesicle  
497 (KV, organ of laterality). While KV area and cilia number were not significantly affected by  
498 *Adsl* depletion, cilia length was reduced in *Adsl* ATG MO treated embryos, a phenotype  
499 that was partially rescued by co-injection of RNA encoding zebrafish *Adsl* (Figure 7D-G).

500 These data, in combination with additional phenotypes, including laterality defects and  
501 hydrocephalus, support the role of ADSL in promoting proper cilia formation or function *in*  
502 *vivo*.

503

**Figure 7**

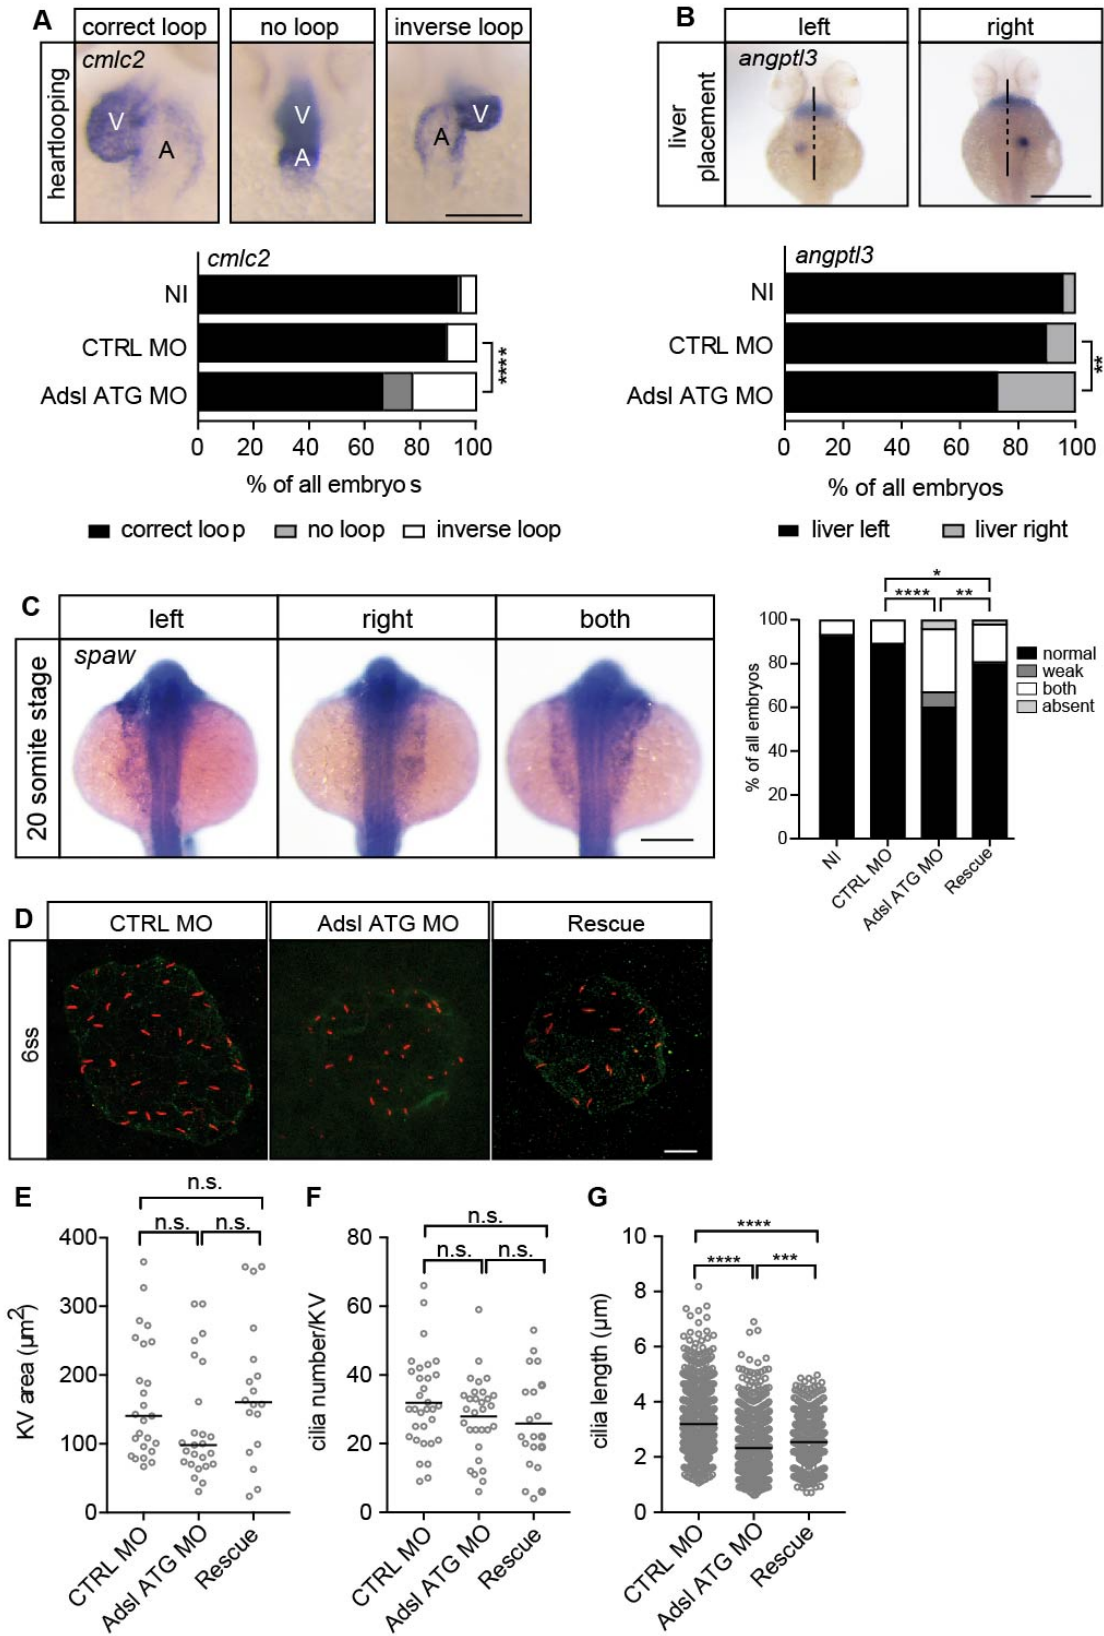

505 **Figure 7. Impaired LR asymmetry and cilium formation in the organ of laterality.**

506 **A.** At 48 hpf ventricle (V) of the two-chambered zebrafish heart is placed left and above  
507 the atrium (A). *Adsl* depleted embryos more frequently develop inversely looped hearts or  
508 developed unlooped hearts (no loop) (as scored by whole mount *in situ* hybridization for  
509 *cardiac myosin light chain 2 (cmlc2)*). N=6 experiments with a total of 266 embryos (NI),  
510 176 embryos (CTRL MO), 188 embryos (*Adsl* ATG MO). Scale bar=100 $\mu$ m. **B.** Whole  
511 mount *in situ* hybridization for *angiopoietin-like 3 (angptl3)* to assess liver placement in 48  
512 hpf embryos. Dorsal view. Scale bar=200 $\mu$ m. 185 NI, 121 CTRL MO and 99 *Adsl* ATG MO  
513 embryos. (A, B) Two-tailed Fisher's exact test; \*\* $p$ <0.0015, \*\*\*\* $p$ <0.0001. **C.** Whole mount  
514 *in situ* hybridization for the left lateral plate mesoderm marker *southpaw (spaw)* at 20  
515 somite stage (ss). *Spaw* is normally expressed in the left lateral plate mesoderm. When  
516 LR asymmetry is disturbed, *spaw* can be detected on the right side or on both sides.  
517 Aberrant expression of *spaw* in *Adsl* morphants. Co-injection of RNA encoding zebrafish  
518 *Adsl* restores proper *spaw* expression. Two-tailed Fisher's exact test; \* $p$ =0.0451, \*\* $p$   
519 =0.0016, \*\*\*\* $p$ <0.0001. Results from 5 experiments with 121 embryos (NI), 142 (CTRL  
520 MO), 128 (*Adsl* ATG MO) and 105 (Rescue) are shown. Scale bar=200 $\mu$ m. **D.** Confocal  
521 z-stacks of the Kupffer's vesicle (KV) of 6 somite stage (ss) embryos. Cilia are stained red  
522 (acetylated tubulin), while apical cell borders were stained for PKC $\zeta$  (green). Scale  
523 bar=10 $\mu$ m. **E.** No significant changes in the size of the KV upon *Adsl* depletion. n= 25  
524 (CTRL MO), 25 (*Adsl* ATG MO) and 18 embryos (rescue with zebrafish *adsl* RNA). Each  
525 circle is one embryo, line indicates median. Kruskal-Wallis test with Dunn's correction.  
526 p-values: CTRL MO vs. *Adsl* ATG MO: 0.2582, CTRL MO vs. Rescue: >0.9999, *Adsl* ATG  
527 MO vs. Rescue: 0.1684. **F.** No significant changes in the number of cilia per KV. n=32  
528 (CTRL MO), 30 (*Adsl* ATG MO) and 20 embryos (rescue with zebrafish *adsl* RNA). Each  
529 circle is one embryo, lines show means. One-way ANOVA with Sidak's multiple  
530 comparison test.  $p$ = 0.5538 (CTRL MO vs. *Adsl* ATG MO), 0.2844 (CTRL MO vs. Rescue),  
531 0.9225 (*Adsl* ATG MO vs. Rescue). **G.** Shorter cilia in *Adsl* morphants can be partially  
532 elongated by coinjection of RNA encoding zebrafish *Adsl*. n= 960 cilia (CTRL MO), 798  
533 (*Adsl* ATG MO), 540 (Rescue). Kruskal-Wallis test with Dunn's correction, lines indicate  
534 medians; \*\*\* $p$ =0.0008.

535

536 **MTX treatment rescues neurogenesis in *Adsl* depleted zebrafish**

537 As ciliogenesis defects were metabolite dependent in human cells, we examined the  
538 effects of inhibiting purine synthesis at steps prior to ADSL in the DNPS pathway during

539 zebrafish development. We quantified the effects of *Adsl* depletion on differentiating  
 540 neuronal cells by staining for the marker *Elavl3/4*. Similar to what we observed in the  
 541 chicken neural tube, depletion of *adsl* caused a significant reduction in *Elavl3/4* positive  
 542 cells that could be rescued by the co-injection of RNA encoding zebrafish *Adsl* (Figure  
 543 8A). We next treated control and *Adsl* depleted embryos with MTX to attenuate the DNPS  
 544 pathway upstream of ADSL and reduce SAICAR production. Treatment with MTX  
 545 completely rescued the reduction in *Elavl3/4* positive cells in the neural tube, indicating  
 546 that this was not a result of impaired DNPS *per se*, but a consequence of intermediate  
 547 metabolite accumulation (Figure 8B). Similar results were observed with a second  
 548 morpholino targeting (Figure S7). We next examined the effect of MTX treatment on Sox2  
 549 positive neural progenitors in the developing forebrain (Figure 8C, upper right panel).  
 550 Depletion of *Adsl* reduced the number of Sox2 positive cells and this was rescued by co-  
 551 treatment with MTX (Figure 8C). These data indicate a specific role of SAICAR  
 552 accumulation in the neural progenitor defects associated with *Adsl* depletion.  
 553

Figure 8

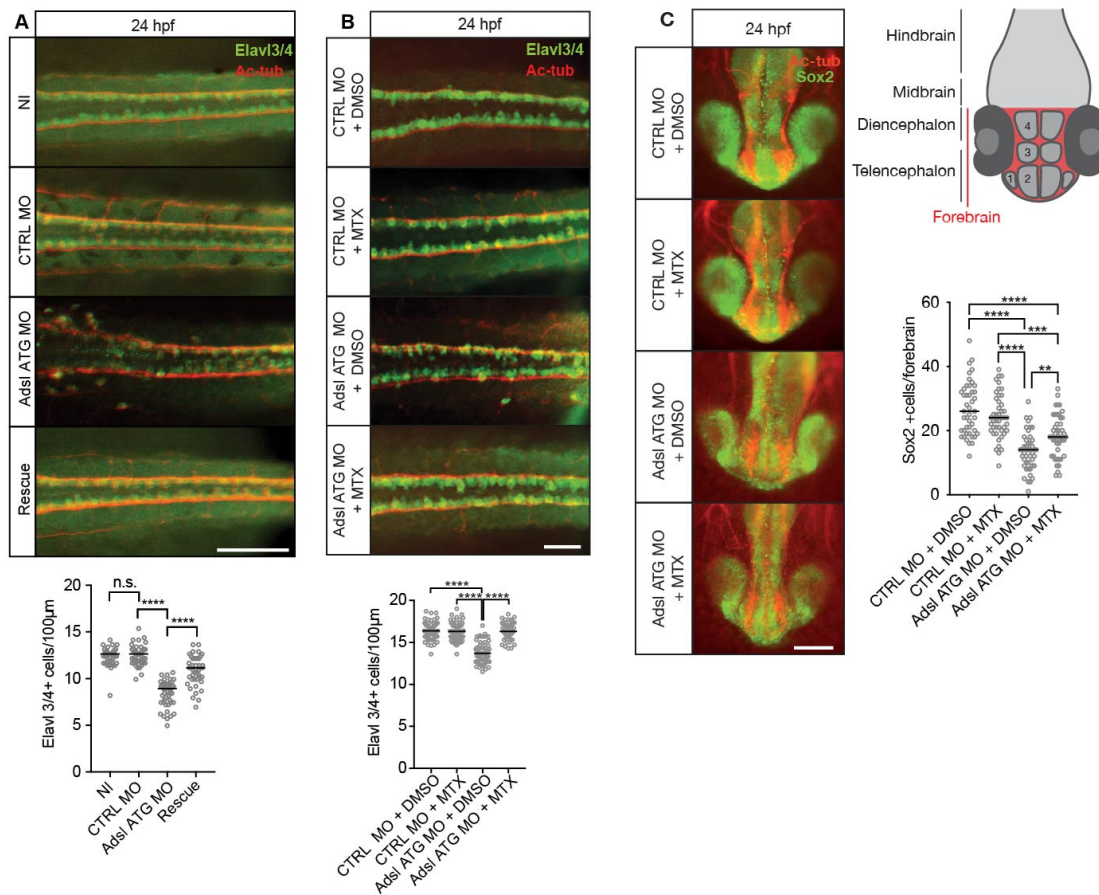

555 **Figure 8. Adsl depletion reduces neuronal lineage cell numbers that can be rescued**  
556 **by Methotrexate treatment. A.** Immunofluorescence whole-mount microscopy of neural  
557 tubes of 24 hpf zebrafish embryos (dorsal view) stained for acetylated tubulin (axons, red)  
558 and Elavl3/4 (green). Fewer Elavl3/4 positive cells in Adsl depleted embryos, that can be  
559 rescued by co-injection with RNA encoding zebrafish Adsl (Rescue). Graph shows  
560 Elavl3/4 counts of individual embryos, line indicates median. 3 experiments with 45  
561 embryos (NI), 45 (CTRL MO), 45 (Adsl ATG MO), 45 (Rescue). Kruskal-Wallis test with  
562 Dunn's correction. ns  $p > 0.9999$ , \*\*\*\* $p < 0.0001$ . Scale bar=100 $\mu$ m. **B.** Methotrexate (MTX)  
563 treatment rescues Elavl3/4 positive cell numbers. Staining of the neural tube (dorsal view)  
564 of 24 hpf zebrafish embryos for acetylated tubulin (red) and or Elavl3/4 (green). Adsl  
565 morphants show fewer Elavl3/4 positive cells, which could be rescued by treatment with  
566 100  $\mu$ M MTX. 5 experiments with 69 (CTRL MO), 75 (CTRL MO + MTX), 63 (Adsl ATG  
567 MO) and 58 (Adsl ATG MO + MTX) embryos. One-way ANOVA with sidak's multiple  
568 comparison. ns  $p > 0.9999$ , \*\*\*\* $p < 0.0001$ . Scale bar=50 $\mu$ m. **C.** Forebrains of 24 hpf  
569 zebrafish embryos (left panels) stained for acetylated tubulin (red) and Sox2 positive  
570 neural progenitors (green), anterior view. Scale bar=200 $\mu$ m. Schematic of the developing  
571 brain of zebrafish embryos adapted from (19), top right panel. The forebrain (red) is  
572 composed of the telencephalon with the olfactory bulb (1), the pallium (2), the optic recess  
573 region (3) and the diencephalon with the hypothalamus (4). Quantification of phenotypes  
574 (bottom right panel). Adsl morphants show fewer neural progenitor cells in the forebrain,  
575 that can partially be rescued with 100  $\mu$ M MTX from tailbud stage on. Data were analyzed  
576 using one-way ANOVA with Sidak's multiple comparison. Dashes show medians.  
577 Experiments with 45 embryos (CTRL MO + DMSO), 45 embryos (CTRL MO + MTX), 45  
578 embryos (Adsl ATG MO + DMSO), 47 embryos (Adsl ATG MO + MTX). If not shown in  
579 the graph all other comparisons are not significant.  
580

Figure S7

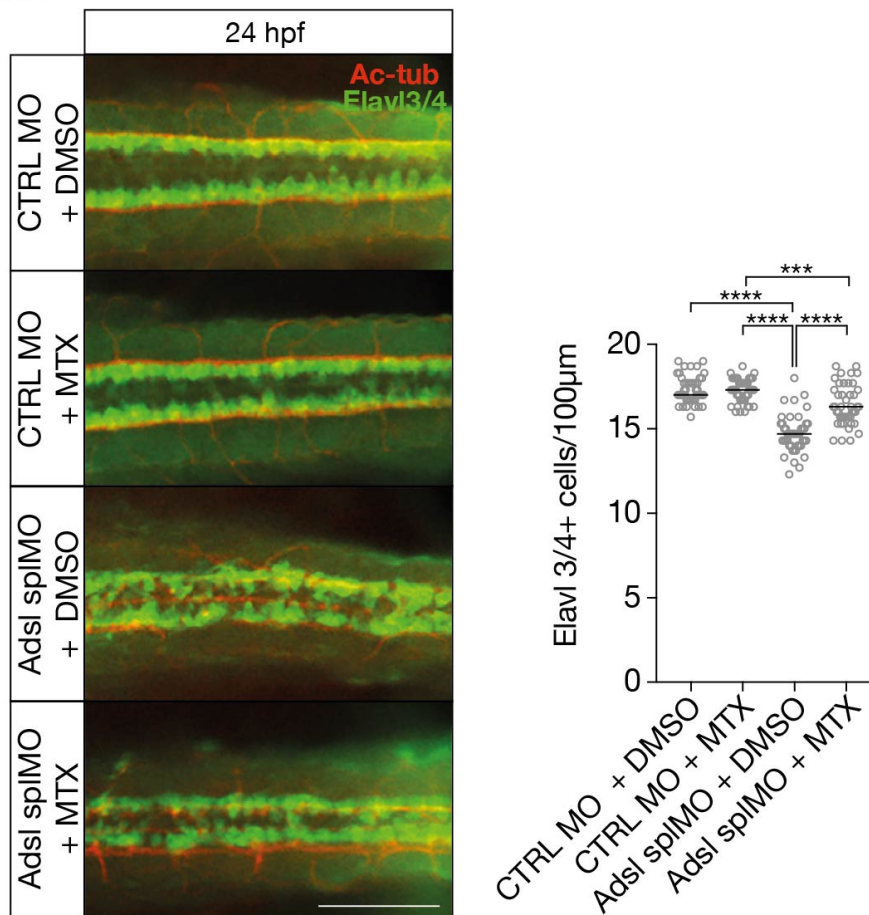

581

582 **Supplemental Figure S7.** Dorsal view of part of the neural tube of 24 hpf zebrafish  
583 embryos (left panels). Acetylated tubulin (Ac-tub) is shown in red. Neural cells are stained  
584 for Elavl3+4 (green). Adsl morphants (spIMO) show fewer neuronal cells, which can be  
585 partially rescued by treatment with 100  $\mu$ M Methotrexate from tailbud stage on. Data were  
586 analyzed by using one-way ANOVA with Sidak's multiple comparison. Dashes show  
587 median. Experiments with 45 embryos (CTRL MO + DMSO), 45 embryos (CTRL MO +  
588 MTX), 45 embryos (Adsl spIMO + DMSO), 45 embryos (Adsl spIMO + MTX). If not shown  
589 in graph, all other comparisons are not significant. Scale bar=100 $\mu$ m

590

591

## Discussion

592

593

594

595

596

Despite a detailed understanding of the enzymology of the DNPS pathway, the specific cell and organismal effects underlying the complex etiology of ADSLD remain unclear. ADSLD-linked clinical phenotypes were proposed to results from toxic accumulation of metabolites such as SAICAr, but the cellular defects that may result from increased SAICAr levels and the contribution of purine deficiency, if any, have not been investigated.

597 Our results uncovered multiple phenotypes in both human RPE-1 cells, as well as  
598 developing chicken and zebrafish, that can be rescued by distinct interventions. DNA  
599 damage signaling was suppressed by nucleoside supplementation, suggesting that this  
600 was caused by purine deficiency that we could readily detect in ADSL depleted human  
601 cells. In contrast, defects in primary ciliogenesis were rescued by PAICS inhibitor or MTX  
602 and phenocopied by SAICAr administration, indicating that they resulted specifically from  
603 SAICAr accumulation. In ADSL depleted RPE-1 cells, we could also detect p53 activation  
604 and defects in cell cycle progression, in the absence of cell death or senescence. These  
605 phenotypes were insensitive to nucleoside supplementation or SAICAr modulation,  
606 indicating the involvement of additional pathways.

607

608 Microcephaly, which is present in a subset of more severe ADSLD patients, was observed  
609 in zebrafish embryos following *Adsl* depletion. Similarly, ADSL depletion in chicken  
610 embryos led to a reduction in neural tube size. Together, the results suggest that they are  
611 potentially valuable models for understanding the etiology of the disease(3). DNA damage,  
612 p53 activation and defects in cilia function, that we observed following ADSL depletion,  
613 have all been implicated in neurodevelopmental disorders associated with  
614 microcephaly(20). One prominent example is Seckel Syndrome. In patients with mutations  
615 in *ATR*, Seckel Syndrome is caused by progenitor cell death due to replication stress and  
616 DNA damage(21, 22). This is accompanied by extensive p53 activation, but co-deletion of  
617 p53 exacerbated the cellular and organismal phenotypes, indicating a protective effect of  
618 p53 induction. In addition, mutations in centrosomal proteins, such as  
619 CENPJ/SAS4/CPAP or CEP63, have also been implicated in Seckel Syndrome(23, 24).  
620 In contrast to mice expressing hypomorphic *Atr*, progenitor loss in mice with CEP63 or  
621 CENPJ/SAS4 deficiency resulted from mitotic delays and the activation of the USP28-  
622 53BP1-dependent mitotic surveillance pathway(25–31). In this case the phenotype was  
623 completely rescued by p53 co-deletion, revealing p53-dependent cell death as main driver  
624 of the phenotype. Despite the phenotypic similarities at the cellular level, we did not detect  
625 increased cell death as result of ADSL deficiency, indicating that the reduced cellularity  
626 following ADSL depletion is mechanistically distinct from Seckel Syndrome.

627

628 We propose that the reduction in brain size resulting from ADSL depletion is largely due  
629 to the impaired cell cycle progression observed in SOX2 positive progenitors. This is  
630 supported by the overall reduction in SOX2 positive cells that we observed in both chicken



631 and zebrafish embryos after ADSL depletion. As a result, differentiated ELAVL3/4 positive  
632 cell numbers were also reduced in both systems. Cell cycle delay is further supported by  
633 the observation that contrary to overall Sox2 positive cell number, the number of  
634 transfected, Sox2-positive cells in chicken embryos was increased relative to controls. In  
635 agreement with our findings, nutrient restriction was shown to arrest the proliferation of  
636 neural progenitors of *Xenopus larvae* and zebrafish reversibly in G2, suggesting that most  
637 of the cells were quiescent(32). While arrest did not require mTOR signaling, nutrient  
638 dependent cell cycle reentry was mTOR dependent. Purine deficiency was shown to inhibit  
639 the mTORC1 pathway, which regulates protein synthesis in response to nutrient  
640 availability(14). Inactivation of mTORC1 results in microcephaly in mouse models, but  
641 similar to Seckel Syndrome, this was attributed mainly to increased levels of cell death(33).  
642 Thus, while we cannot rule out a role for dysregulated mTOR in the phenotypes associated  
643 ADSLD, it is unlikely a major contributor.

644

645 In zebrafish, we could largely rescue neural progenitor loss by treatment with MTX,  
646 indicating that this was likely not the result of defects in overall purine synthesis, but due  
647 primarily to the accumulation of specific metabolites, most likely SAICAr. While there are  
648 currently no treatments for ADSLD, current clinical trials (NCT03776656) are examining  
649 the efficacy of the HPRT substrate analog allopurinol in an attempt to reduce the  
650 production of SAICAr and S-Ado in ADSLD patients. While our experiments focused on  
651 embryonic effects on the neural progenitor population, SAICAr accumulation may also  
652 affect primary cilia in the post-natal brain. The molecular targets of SAICAR remain largely  
653 unclear but its accumulation has been linked to activation of PKM2, and other kinases, in  
654 the context of glucose deficiency in cancer (10–12). Recent work has also implicated  
655 ADSL in the activation of MYC, that plays a major role in controlling metabolism and  
656 proliferation in cancer cells(34). Considering that ciliogenesis is a highly regulated process  
657 and tightly coordinated with the cell cycle, modulation of central signaling pathways that  
658 control energetics and proliferation may be one way by which SAICAr could affect cilia.  
659 Alternatively, SAICAr could impinge on more direct regulators of ciliogenesis. To address  
660 this future work will have to determine the cellular SAICAr interactome and identify the  
661 disease-relevant targets.

662

663 To our knowledge, this is the first demonstration of a specific purine metabolite impairing  
664 ciliogenesis. While ciliopathy-like features have not been described for the pathology of

665 ADSLD, we observed a robust rescue of the neural progenitor population following MTX  
666 treatment, suggesting that SAICAr and its effects on cilia may be involved. Consistent with  
667 effects on cilia *in vivo*, we observed shorter cilia in the KV of zebrafish, as well as several  
668 ciliopathy related phenotypes, consistent with impairment of ciliogenesis or cilia function  
669 by SAICAr accumulation on *in vivo*. *Adsl*-depleted zebrafish also presented with defects  
670 in skull cartilage formation that is coordinated with brain size, in part through cilia based  
671 sonic hedgehog signaling(35). Primary cilia and Hedgehog signaling have well established  
672 roles in regulating multiple progenitor populations in the developing brain(36). However,  
673 we also note that severe defects in primary cilia function or Hedgehog signaling cause  
674 more drastic reductions in progenitor proliferation and numbers than we observed in either  
675 system, potentially consistent with the milder ciliogenesis effects observed *in vivo*(37, 38).  
676 Moreover, we have used ADSL knockdown in our experimental systems and it is currently  
677 unclear to what extent the observed ciliary defects would be recapitulated by ADSL  
678 mutations in patients and in what tissues and cell types. If ADSL deficiency would be less  
679 severe or only a subset of tissues would be affected, patients may not present classic and  
680 widespread ciliopathy features. Together, our work provides the first cell-level analysis of  
681 ADSL deficiency, identifies specific cellular defects, and ascribes these to either SAICAr  
682 accumulation or purine deprivation. Highlighting the complex etiology of ADSLD, our  
683 results add further support to the notion that SAICAr plays a key role and establish a  
684 framework for deciphering the underlying molecular mechanisms.

685

## 686 **Materials and Methods**

### 687 **Human cells culture**

688 Human immortalized hTERT-RPE-1 WT, TP53 knock out (kind gift from Brian Tsou), RPE-  
689 1 expressing pLenti-EGFP and pLenti-ADSL\*EGFP (siRNA resistant mutant) cells were  
690 cultured in Dulbecco's modified Eagle Medium-F12 (DMEM-F12; Thermo Fisher  
691 Scientific) supplemented with 10% (v/v) fetal bovine serum (Millipore Sigma) and 100 U  
692 ml<sup>-1</sup> penicillin–streptomycin at 37°C and 5% CO<sub>2</sub> in humidified atmosphere. For cilia  
693 experiments, silenced RPE-1 cells were serum starved for 48 hrs in OptiMEM (Thermo  
694 Fisher Scientific).

695

### 696 **Drugs used and concentrations**

697 1 mg/ml SAICAr (Carbo Synth) was added to the cells for 96 hrs, to mimic ADSL depletion.  
698 60 μM nucleosides (100X Embryomax, Merck Millipore) were added from the first silencing

699 to the end at 1X in the culture medium. MRT00252040 (kindly provided by Simon Osborne,  
700 LifeArc, London, UK) dissolved in DMSO was used at 2  $\mu$ M and MTX (Millipore Sigma) at  
701 4  $\mu$ M as described in (14). ATM inhibitor (KU-55933; Selleckem) was used at 5 mM for 24  
702 hrs before fixation. Doxorubicin (Millipore Sigma) was used as positive control for  
703 senescence at 1 ug/ml for 6 days.

704

#### 705 **siRNA transfections**

706 RPE-1 (hTERT-RPE-1; ATCC) were transfected with 100 nM siRNAs (Millipore Sigma or  
707 Dharmacon) with Lipofectamine RNAiMAX (Thermo Fisher Scientific) in Opti-MEM  
708 (Gibco) without antibiotics for one or two rounds of 48 hrs, depending on the gene to be  
709 silenced. We used siGFP (GGCUACGUCCAGGAGCGCCGCACC) and siGL2  
710 (CGUACGCGGAAUACUUCGA) as negative controls (siC). In this study we used a smart  
711 pool (four siRNAs) against *ADSL* (Dharmacon) or single oligos siADSL#2 5'-  
712 CAAGAUUUGCACCGACAUA-3' (Millipore Sigma). The siRNA-resistant mutant was  
713 designed to be resistant to siADSL#2. For rescue experiments with siCP110 we used three  
714 oligos (#1 5'-GCAAAACCAGAAUACGAGAUU-3', #2 5'-  
715 CAAGCGGACUCACUCCAUAATT-3' and #3 5'-TAGACTTATGCAGACAGATAA-3'  
716 (Millipore Sigma) for 24 hrs.

717

#### 718 **RNA extraction and quantitative real time-PCR**

719 RPE-1 cells (ATCC) were seeded in a 6 well-plate, silenced for 96 hrs, washed twice in  
720 PBS and resuspended in 300  $\mu$ l of Tri-Reagent (Millipore Sigma). RNA was isolated by  
721 centrifugation followed by chloroform extraction, isopropanol precipitation, washing twice  
722 in 75% ethanol and resuspended in 20  $\mu$ l DEPC-treated water (Thermo Fisher Scientific).  
723 Total RNA was quantified with a Nanodrop 8000 Instrument (Thermo Fisher Scientific). 1  
724  $\mu$ g of total RNA was used for the reverse transcription reaction performed by High Capacity  
725 RNA-to-cDNA Kit (Applied Biosystems), according to the manufacturer's  
726 recommendations, in a 2 $\times$ RT buffer mix, supplemented with dNTPs, random primers and  
727 RT enzyme in a final volume of 20  $\mu$ l. Quantitative real time PCR (qRT-PCR) was  
728 performed using the comparative CT method and a Step-One-Plus Real-Time PCR  
729 Instrument (Thermo Fisher). Amplification of the 16 ng of cDNA was done in triplicate with  
730 TaqMan Universal PCR Master Mix (Thermo Fisher) for *ADSL* and *GAPDH*.

731

#### 732 **Plasmid cloning and generation of stable cell line**

733 Human ADSL<sup>WT</sup> cDNA was PCR amplified using KOD Hot start DNA polymerase  
734 (Millipore) according to manufacturer's instructions (primers: forward containing 5'-BsiWI  
735 (ADSL-BsiWI-F-5'AAAACGTACGATGGCGGCTGGAGGCGATCAT3') and reverse  
736 primer containing 3'-EcoR1 restriction sites (ADSL-EcoR1-R:  
737 5'TTTTGAATTCCAGACATAATTCTGCTTTCA3'). PCR products were purified by using  
738 PureLink Quick Gel Extraction kit (ThermoFisher) and cloned into pCR2.1-TOPO vector  
739 (Invitrogen). Omnimax competent E. coli cells were transformed with the pCR2.1-TOPO  
740 clones and colonies were selected in carbenicillin. Constructs were then sequenced with  
741 primers for the TOPO vector (T7 Promoter-F and M13-R). By using the restriction enzymes  
742 AscI and Not1-HF (New England Biolabs), ADSL was cut from the TOPO vector and after  
743 gel purification, it was ligated into the MCS-BioID2-HA vector, a gift from Kyle Roux  
744 (Addgene plasmid #74224; <http://n2t.net/addgene:74224>; RRID:Addgene\_74224)(39)  
745 with Quick ligation kit (BioLabs). Omnimax competent *E.coli* cells were transformed and  
746 selected with carbenicillin. The construct was confirmed by restriction digestion and  
747 sequencing (Macrogen). The human ADSLD patient mutation R426H was generated  
748 using the QuikChange mutagenesis kit (Thermo Fisher) with the following primers:  
749 ADSL<sup>R426H</sup>, FW, 5'-AGGCATCAACCTGGATATGCTCTATGAGGTCATTG-3' and RV, 5'-  
750 CAATGACCTCATAGAGCATATCCAGGTTGATGCCT-3'. For complementation  
751 experiments, we cloned ADSL<sup>WT</sup> cDNA and the siRNA resistant mutant into the pLenti-  
752 CMV-eGFP-BLAST (659-1) plasmid, a gift from Eric Campeau & Paul Kaufman (Addgene  
753 plasmid #17445; <http://n2t.net/addgene:17445>; RRID:Addgene\_17445)(40), using  
754 primers containing *XhoI* and *EcoRI* overhangs (ADSL- *XhoI* FW 5'-  
755 AAAACTCGAGCGATGGCGGCTGGAGGCGATCAT-3' and ADSL-*EcoRI*-RV 5'-  
756 TTTTGAATTCCAGACATAATTCTGCTTTCA-3'). The siRNA resistant mutant was  
757 produced by introducing 5 different silent mutations using the QuikChange mutagenesis  
758 kit (Thermo Fisher) with the following primers: forward, 5'-  
759 GGTTTGCCAGGAGGCGTAGGTCTTTGCAAATTGTGTGCACTGATGCCCCCA-3'. And  
760 reverse 5'-CCAAACGGTCCTCCGCATCCAGAAACGTTTAAACACACGTGACT  
761 ACGGGGGT-3'. Constructs were checked by sequencing (Macrogen) and expression  
762 was checked by western blot and immunofluorescence. For virus preparation: 6 × 10<sup>6</sup>  
763 AD293 cells were plated in 15 cm culture dishes, and transfected with 20 µg pLenti-CMV-  
764 EGFP empty and pLenti-CMV-ADSL\*-EGFP, 2 µg REV, 6 µg RSV-RRE and 2 µg VSV-G  
765 plasmids with 160 µl PEI pH 7.0 (Polyscience Euro) and 150 mM NaCl. After 48 hrs the  
766 medium containing the viruses was cleared with a 0.45 mm filter (Millipore) and added to

767 the target cells. Three days after the infection, cells were selected with blasticidin  
768 (Invitrogen) for 7 days.

769

#### 770 **Immunofluorescence (human cells)**

771 Silenced RPE-1 cells were seeded on 18 mm round coverslips after 96 hrs of silencing  
772 and fixed accordingly with the antibody requirements, with 4% PFA for 10 or 30 min,  
773 followed by 0.1% Triton-PBS for 5 min and stored in 100% EtOH. Cells were incubated  
774 with the blocking solution of 3% bovine serum albumin (Millipore Sigma) in PBT for 30  
775 min. Primary antibodies (listed below) were diluted in the same blocking solution and  
776 incubated for 1 hr at RT. After three washes, cells were incubated with Alexa Fluor-  
777 conjugated 594 and 488 secondary antibodies (Thermo Fisher) at 1:400 dilution for 1 hr  
778 at RT. DAPI was used to visualize the DNA. Slides were imaged using Orca AG camera  
779 (Hamamatsu) on a Leica DMI6000B microscope equipped with 1.4 100X oil immersion  
780 objective. AF6000 software (Leica) was used for image acquisition. Image processing and  
781 quantification was performed with ImageJ software. Intensities were measured in images  
782 acquired with the same exposure settings and subtracting the background for each image.

783

#### 784 **Antibodies**

785 Staining of human cells was performed with the following primary antibodies:  $\alpha$ -ADSL  
786 (Millipore Sigma, rabbit, 1:100 IF, 1:1000 western),  $\alpha$ -ARL13B (Santa Cruz Biotechnology,  
787 mouse monoclonal C5, 1:100), PCNT (Novus Biologicals, rabbit, 1:400),  $\alpha$ -p53 (Cell  
788 Signaling, mouse monoclonal 1C12, 1:100),  $\alpha$ -RPA (Calbiochem, mouse monoclonal Ab-  
789 3, 1:100)  $\alpha$ -53BP1 (Novus Biologicals, rabbit, 1:400),  $\alpha$ -pSer139-H2A.X (Santa Cruz  
790 Biotechnology, rabbit, 1:100),  $\alpha$ -Actin (Millipore Sigma, mouse monoclonal AC-40,  
791 1:1500),  $\alpha$ -Vimentin (Abcam, rabbit, 1:100),  $\alpha$ -CK20 (DaKo, mouse, 1:200),  $\alpha$ -Centrobilin  
792 (a kind gift from Ciaran Morrison, mouse, 1:500 (41)),  $\alpha$ -Centrin (EMD Millipore, mouse,  
793 1:1,000),  $\alpha$ -CP110 (a kind gift from Andrew Holland, rabbit, 1:1000).

794 Staining of chicken tissues was performed with the following primary antibodies:  $\alpha$ -  
795 ELAVL3/4 (Molecular Probes Molecular Probes, mouse, 1:500),  $\alpha$ - $\beta$ -TubulinIII-Tuj1  
796 (Covance, mouse, 1:1000), Pax6 (DSHB, mouse, 1:250), SOX2 (Invitrogen, rabbit, 1:500),  
797 pH3S10 (Millipore, rabbit, 1:500), Cleaved-Caspase-3 (Millipore, rabbit, 1:500). Staining  
798 of zebrafish tissues was performed with the following primary antibodies:  $\alpha$ -ELAVL3/4  
799 (GeneTex, rabbit, 1:1000),  $\alpha$ -acetylated-alpha-tubulin (Sant Cruz Biotechnology, mouse

800 monoclonal 6-11B-1, 1:1000),  $\alpha$ -SOX2 (Abcam, rabbit, 1:1000),  $\alpha$ - $\gamma$ H2AX (GeneTex,  
801 rabbit, 1:400),  $\alpha$ -ADSL (Millipore Sigma, rabbit, 1:200) and  $\alpha$ -PKC $\zeta$  (Sant Cruz  
802 Biotechnology, rabbit, 1:500).

803

#### 804 **Cell proliferation and cell death**

805 150,000 RPE-1 cells were plated in 6-well plates and silenced with control or siADSL  
806 oligos (Millipore Sigma) for 72 hrs, when they were counted and plated again in the same  
807 amount for the second round of silencing. After 3 days cells were counted as second  
808 timepoint (144 hrs, 6 days) and seeded for a third timepoint (9 days). Cells were cultured  
809 in the presence of serum for all the experiment. The  $\Delta$ PDL (difference in population  
810 doubling levels) was obtained by using the formula:  $\log(N1/N0)/\log2$ , where N1 is the  
811 number of cells at the timepoint we collected them and N0 is the initial number of cells  
812 plated(42). For detecting cell death, cells in suspension were collected in the growth  
813 medium and the attached ones were trypsinized and resuspended in complete medium to  
814 block trypsin activity. Cells were then mixed in 0.4% trypan blue solution (Gibco). The  
815 number of blue-positive cells and total cell number was quantified at the microscope.

816

#### 817 **Cell extracts and western blotting**

818 RPE-1 cells were seeded in a 6-well plate and after 96 hrs of silencing they were  
819 trypsinized, washed once in PBS and resuspended in a 2X SDS lysis buffer (2X SDS lysis  
820 buffer contained 4% SDS, 20% glycerol, 120 mM Tris/HCl pH 6.8, 1x protease (Roche)  
821 and phosphatase inhibitors (Millipore Sigma)). Protein concentration was quantified using  
822 the DC Protein Assay (Bio-Rad), and proteins separated by SDS-PAGE and transferred  
823 to 0.2  $\mu$ m nitrocellulose membrane (Amersham Protran) or 0.45  $\mu$ m PVDF membrane  
824 (Millipore Sigma) depending on the molecular weight. Membranes were blocked in 5%  
825 milk in PBT (PBS containing 0.2% Tween-20) for 30 min and then incubated with primary  
826 antibodies for 1 hr at RT. After three washes in PBS containing Tween-20 0.02%,  
827 membranes were incubated with secondary antibodies conjugated to HRP and protein  
828 bands were visualized by ECL-Plus (Millipore Sigma).

829

#### 830 **Senescence-associated (SA) $\beta$ -galactosidase assay**

831 RPE-1 were silenced for 96 hrs with siControl and siADSL#2, then fixed in ice-cold X-gal  
832 fixative solution (containing 4% formaldehyde, 0.5% gluteraldehyde, 0.1 M sodium  
833 phosphate buffer pH 7.2) for 4 minutes. After two washes in PBS, X-gal (Roche) was

834 diluted 1:100 at a final concentration of 1 mg/ml in X-gal solution (containing 5 mM  
835  $K_3Fe(CN)_6$ , 5 mM  $K_4Fe(CN)_6$ , 2 mM  $MgCl_2$  in PBS). Incubation was performed at 37°C for  
836 8 hrs in the dark. Two washes in PBS were performed before taking the images.  
837 Doxorubicin was used as a positive control.

838

### 839 **Statistical analysis**

840 *In vitro* data were analyzed with an unpaired two-sided *t*-test when two samples were  
841 compared, while one-way ANOVA was used to compare more than two samples in the  
842 same graph (GraphPad Prism 6.0, GraphPad Software Inc.). Values of  $p < 0.05$  were  
843 considered statistically significant (\* $p < 0.05$ ; \*\* $p < 0.01$ ; \*\*\* $p < 0.001$ ; \*\*\*\* $p < 0.0001$ ). Two or  
844 more independent experiments were performed for each condition and this is indicated in  
845 individual figure legends.

846

### 847 **Cloning (fish)**

848 To generate a template for the generation of an antisense *in-situ* probe, a 921 bp fragment  
849 of the *Danio rerio ads1* open reading frame was cloned into pCRII via TOPO TA cloning  
850 (Invitrogen). To have a template for the generation of capped mRNA using the AmpliCap  
851 SP6 High Yield Message Maker Kit (Cellscript) the whole open reading frame of zebrafish  
852 *ads1* was cloned with a N-terminal Flag-tag into pCS2+ using EcoRI and XhoI.

853

### 854 **Immunofluorescence (fish)**

855 Zebrafish embryos were fixed with 4% buffered paraformaldehyde at the indicated stages.  
856 Antibody staining was performed as described(43) using the primary antibodies previously  
857 described (see also antibodies section above) and detected with Alexa-Fluor-labelled  
858 secondary antibodies (1:1000, Molecular Probes).

859

### 860 **Statistical analysis (fish)**

861 The number of fertilized eggs per clutch determined the size of experimental groups with  
862 clutches having been randomly and equally divided into treatment groups. No additional  
863 statistical methods have been applied to pre-determine sample size. All zebrafish  
864 experiments were done at least three times with eggs from different mating tanks or  
865 different mating days. Embryo numbers are given in the legends. All statistical analyses  
866 were performed with GraphPad Prism 7 and 8, respectively. Data were tested for normality  
867 and analyzed accordingly by parametric or non-parametric tests. Graphs display, if not

868 indicated otherwise, individual datapoints and medians in case of non-parametric  
869 datasets. An  $\alpha$  level of  $<0.5$  was considered significant.

870

### 871 **Zebrafish maintenance and manipulation**

872 Zebrafish were maintained in a 14 hrs light and 10 hrs dark cycle in a standardized, water  
873 recycling housing system (Tecniplast) with automatic monitoring and adjustments of pH,  
874 conductivity and temperature. Fertilized eggs were generated by natural matings of the  
875 wild-type strains EK or AB. Eggs were incubated at 28.5 °C and allowed to develop until  
876 the desired stages. In order to achieve *Adsl* knockdown, a translation blocking antisense  
877 morpholino oligonucleotide (*Adsl* ATG MO) (5'- TCCCTCCATGCCTGCAGCGGTTAAA)  
878 was used or a MO which targets the exon-intron boundary at exon 4 of *Adsl* (*Adsl* SpIMO)  
879 (5'- CCAACTGTGGGAGAGAGCGACTGTA). A standard control MO was also used in all  
880 experiments. MOs (GeneTools Inc) were injected at the 1-2 cell stage directly into the yolk.  
881 In addition, non-injected wild-type embryos served as internal control for clutch quality.  
882 For pharmacological manipulation zebrafish embryos were immersed in embryo water  
883 containing 1% DMSO or 1% DMSO and 100  $\mu$ M methotrexate (MTX; Cayman Chemicals)  
884 from 10 until 24 hrs post fertilization (hpf) or 50  $\mu$ M nucleosides. All zebrafish maintenance  
885 and procedures have been approved by the Veterinary Care Unit at Ulm University and  
886 University of Tübingen, respectively and the animal welfare commissioner of the regional  
887 board for scientific animal experiments in Tübingen, Germany. Zebrafish experiments  
888 were performed according to the European Union Directive 86/609/EEC for the protection  
889 of animals used for experimental and other scientific purposes.

890

### 891 ***In situ* hybridization (ISH)**

892 Zebrafish were fixed over night at 4°C at the indicated stages using 4% buffered  
893 paraformaldehyde, dehydrated with a gradual methanol series and stored at -20 °C until  
894 further use. For ISH embryos were rehydrated in a methanol series containing PBST (PBS  
895 containing 0.1% Tween-20) and processed according to standard protocols(44). Genes of  
896 interest were detected using DIG-labeled *in situ* probes, which were *in vitro* transcribed  
897 from linearized plasmids carrying fragments of the gene of interest: *adsl* (Genbank  
898 no.199899.2), *angiopoietin-like 3 (angptl3)* (Genbank no. AF379604). The probes against  
899 *cardiac myosin light chain 2 (cmcl2)* and *spaw* have been described before(45).

900

### 901 **Analysis of cartilage formation**



902 4 days post fertilization (dpf) old zebrafish embryos were fixed for 2 hours at RT using 4%  
903 buffered paraformaldehyde. After rinsing with PBS, embryos were washed for 10 min with  
904 50% EtOH in PBS, before the staining solution (0,02% Alcian blue (Millipore Sigma), 70%  
905 EtOH, 50mM MgCl<sub>2</sub>) was added and the embryos were incubated o/n at RT. On the next  
906 day, embryos were rinsed with H<sub>2</sub>O and subsequently bleached for 20 min at RT with  
907 opened lid of the reaction tube (bleaching solution: 1,5% H<sub>2</sub>O<sub>2</sub> in 1% KOH). A clearing  
908 series was performed (30 min 20% glycerol/0,25% KOH, 2h 50% Glycerol/ 0,1% KOH).  
909 Stained embryos were stored at 4 °C in 50% Glycerol/ 0,1% KOH.

910

### 911 **Measurements of cilia and neural progenitors/differentiated cell populations**

912 To count neural progenitors, anterior views of 24 hpf embryos were taken using a  
913 fluorescent whole mount microscope. The number of Sox2 positive cells within the  
914 forebrain was determined. To count differentiated neural cells, dorsal views of embryos  
915 were captured by fluorescent whole mount microscopy and the number of ELAVL3/4-  
916 positive cells per 100 µm were counted. γH2AX positive cells were counted over a distance  
917 of 300 µm in the neural tube. Cilia were counted and measured after acquiring confocal z-  
918 stacks of flat-mounted tails of 6 somite stage (ss) embryos. The Simple Neurite Tracer in  
919 Fiji was used to trace and measure cilia through the whole z-stack. Image J was also used  
920 to trace and measure the outline of the KVs.

921

### 922 **Microscopy of zebrafish embryos**

923 Live zebrafish embryos and those processed by ISH or for cartilage staining were imaged  
924 using a M125 whole-mount microscope equipped with a Leica IC80 HD camera. Zebrafish  
925 embryos undergoing immunofluorescence stainings were assessed with a M205 FCA and  
926 a DFC 9000 GT sCMOS camera. Confocal z-stacks were acquired on a TCS SP5II with  
927 LAS AF software (All microscopes and software: Leica).

928

### 929 **Chick embryo *in ovo* electroporation**

930 Eggs from White-Leghorn chickens were incubated at 37.5°C in an atmosphere of 45%  
931 humidity and the embryos were staged according to Hamburger and Hamilton(46). Chick  
932 embryos were electroporated with column purified plasmid DNA (3 µg/µl for shRNAs) in  
933 H<sub>2</sub>O containing Fast Green (0.5 µg/µl). Briefly, plasmid DNA was injected into the lumen  
934 of HH12 neural tubes, electrodes were placed on either side of the neural tube and  
935 electroporation was carried out by applying five 50 ms square pulses using an Intracel

936 Dual Pulse (TSS10) electroporator set at 25 V. Transfected embryos were allowed to  
937 develop to the specific stages and then dissected under a fluorescence dissection  
938 microscope.

939

#### 940 **DNA constructs**

941 shRNAs were generated using pSHIN plasmid (a GFP expressing evolution of pSUPER):  
942 shCONTROL sequence (CCGGTCTCGACGGTTCGAGT) and shADSL sequence  
943 (GAGCTGGACAGATTAGTGA). The knockdown efficiency of shRNAs was assessed by  
944 RT-qPCR in electroporated chicken embryonic fibroblast cultures(47).

945

#### 946 **Immunostaining and EdU incorporation in chicken embryos**

947 Embryos were fixed overnight at 4°C in 4% paraformaldehyde and immunostaining was  
948 performed on vibratome sections (60 µm) following standard procedures. After washing in  
949 PBS-0.1% Triton X-100, the sections were incubated overnight with the appropriate  
950 primary antibodies diluted in a solution of PBS-0.1% Triton supplemented with 10% bovine  
951 serum albumin. After washing in PBS-0.1% Triton, sections were incubated for 2 hr at  
952 room temperature with the appropriate Alexa conjugated secondary antibodies diluted in  
953 a solution of PBS-0.1% Triton supplemented with 10% bovine serum albumin. After  
954 staining, the sections were mounted and examined on a Leica SP5 or a Zeiss Lsm 780  
955 multiphoton microscope. For EdU incorporation, 200 µl of EdU solution (1mM) was added  
956 on the vitelline membrane of each embryo 2 h before fixation in 4% paraformaldehyde.  
957 EdU was detected in sections using the Click-iT EdU imaging kit (Invitrogen).

958

#### 959 **Fluorescence Associated Cell Sorting (FACS)**

960 HH-12 chicken embryos were electroporated with shCONTROL or shADSL plasmids and  
961 48 hpe, a single cell suspension was obtained by digestion for 10-15 min with Trypsin-  
962 EDTA (Millipore Sigma) and labeled with Hoechst and  $\alpha$ -ELAVL3/4 antibody used with  
963 Alexa647-conjugated anti-mouse secondary antibody. Alexa647, Hoechst and GFP  
964 fluorescence was determined by FACS Aria Fusion cytometer (BD Biosciences), and the  
965 data were analyzed with FlowJo software (Tree Star) and Multicycle software (Phoenix  
966 Flow Systems; cell cycle profile analysis).

967

#### 968 **Quantitative fluorescence image analysis.**

969 Quantification of Cleaved-Caspase-3 immunofluorescence intensity was done using

970 ImageJ software. Tuj1+ and Tuj1- areas on the electroporated side and the respective  
971 areas on the non-electroporated side were delimited by polygonal selection, and the  
972 mean intensity of Cleaved-Caspase-3 immunofluorescence was quantified as mean gray  
973 values. At least three different images were used to calculate the mean value per embryo.  
974 Each mean value was normalized to the mean value obtained for the respective non-  
975 electroporated area of the same embryo.

976

#### 977 **Author contributions**

978 I.D. performed all experiments involving cultured cells, J.G. and M.B. conducted zebrafish  
979 experiments, A.H. conducted chicken embryo experiments and S.J. and O.Y. performed  
980 metabolomic analysis. I.D, J.G, M.B, A.H, C.B, S.P, M.P, J.L, and T.H.S. analyzed data  
981 and prepared figures, C.B., J.L. and T.H.S. conceived the project, M.P., J.L. and T.H.S.  
982 obtained funding and supervised trainees, I.D, J.L, and T.H.S. designed experiments and  
983 I.D, J.L, and T.H.S. wrote the manuscript with editorial contributions from all authors.

984

#### 985 **Acknowledgements**

986 Thanks to members of the Lüders, Roig and Stracker labs for input, A. Riera for chemistry  
987 advice, C. Morrison for Centrobin antibody, A. Holland for CP110 antibody, B. Tsou for  
988 p53-deficient RPE1 cells, D. Zafra for assistance, C. Donow and S. Burczyk for excellent  
989 help with zebrafish maintenance and LifeArc for supplying MRT00252040. I.D. was funded  
990 by the European Union's Horizon 2020 research and innovation programme under the  
991 Marie Skłodowska-Curie grant agreement No. 754510, T.H.S. and J.L. were funded by  
992 the Ministry of Science, Innovation and Universities (MCIU; PGC2018-095616-B-I00 to  
993 T.H.S and PGC2018-099562-B-I00 to J.L.), the 2017 SGR 1089 (AGAUR), FEDER, the  
994 Centres of Excellence Severo Ochoa award and the CERCA Programme. T.H.S. was  
995 supported by the NIH Intramural Research Program, National Cancer Institute Center for  
996 Cancer Research. M.P. was funded by grants from the Deutsche  
997 Forschungsgemeinschaft (DFG PH144/4-1 and PH144/6-1).

998

999

## Bibliography

- 1000 1. B. Daignan-Fornier, B. Pinson, Yeast to study human purine metabolism diseases.  
1001 *Cells*. **8** (2019), doi:10.3390/cells8010067.
- 1002 2. J. Jaeken, G. Van den Berghe, An infantile autistic syndrome characterised by the  
1003 presence of succinylpurines in body fluids. *Lancet*. **2**, 1058–1061 (1984).
- 1004 3. A. Jurecka, M. Zikanova, S. Kmoch, A. Tylki-Szymańska, Adenylosuccinate lyase  
1005 deficiency. *J. Inherit. Metab. Dis.* **38**, 231–242 (2015).
- 1006 4. T. W. Stone, L. A. Roberts, B. J. Morris, P. A. Jones, H. A. Ogilvy, W. M. Behan, J.  
1007 A. Duley, H. A. Simmonds, M. F. Vincent, G. van den Berghe, Succinylpurines  
1008 induce neuronal damage in the rat brain. *Adv. Exp. Med. Biol.* **431**, 185–189  
1009 (1998).
- 1010 5. G. Giaever, A. M. Chu, L. Ni, C. Connelly, L. Riles, S. Véronneau, S. Dow, A.  
1011 Lucau-Danila, K. Anderson, B. André, A. P. Arkin, A. Astromoff, M. El-Bakkoury, R.  
1012 Bangham, R. Benito, S. Brachat, S. Campanaro, M. Curtiss, K. Davis, A.  
1013 Deutschbauer, K.-D. Entian, P. Flaherty, F. Foury, D. J. Garfinkel, M. Gerstein, D.  
1014 Gotte, U. Güldener, J. H. Hegemann, S. Hempel, Z. Herman, D. F. Jaramillo, D. E.  
1015 Kelly, S. L. Kelly, P. Kötter, D. LaBonte, D. C. Lamb, N. Lan, H. Liang, H. Liao, L.  
1016 Liu, C. Luo, M. Lussier, R. Mao, P. Menard, S. L. Ooi, J. L. Revuelta, C. J. Roberts,  
1017 M. Rose, P. Ross-Macdonald, B. Scherens, G. Schimmack, B. Shafer, D. D.  
1018 Shoemaker, S. Sookhai-Mahadeo, R. K. Storms, J. N. Strathern, G. Valle, M. Voet,  
1019 G. Volckaert, C. Wang, T. R. Ward, J. Wilhelmy, E. A. Winzeler, Y. Yang, G. Yen,  
1020 E. Youngman, K. Yu, H. Bussey, J. D. Boeke, M. Snyder, P. Philippsen, R. W.  
1021 Davis, M. Johnston, Functional profiling of the *Saccharomyces cerevisiae* genome.  
1022 *Nature*. **418**, 387–391 (2002).
- 1023 6. B. Pinson, S. Vaur, I. Sagot, F. Coulpier, S. Lemoine, B. Daignan-Fornier,  
1024 Metabolic intermediates selectively stimulate transcription factor interaction and  
1025 modulate phosphate and purine pathways. *Genes Dev.* **23**, 1399–1407 (2009).
- 1026 7. P. Chen, D. Wang, H. Chen, Z. Zhou, X. He, The nonessentiality of essential  
1027 genes in yeast provides therapeutic insights into a human disease. *Genome Res.*  
1028 **26**, 1355–1362 (2016).
- 1029 8. R. Marsac, B. Pinson, C. Saint-Marc, M. Olmedo, M. Artal-Sanz, B. Daignan-  
1030 Fornier, J.-E. Gomes, Purine Homeostasis Is Necessary for Developmental  
1031 Timing, Germline Maintenance and Muscle Integrity in *Caenorhabditis elegans*.  
1032 *Genetics*. **211**, 1297–1313 (2019).
- 1033 9. A. R. Fenton, H. N. Janowitz, M. R. McReynolds, W. Wang, W. Hanna-Rose, A  
1034 *Caenorhabditis elegans* model of adenylosuccinate lyase deficiency reveals  
1035 neuromuscular and reproductive phenotypes of distinct etiology. *BioRxiv* (2017),  
1036 doi:10.1101/181719.
- 1037 10. K. E. Keller, I. S. Tan, Y.-S. Lee, SAICAR stimulates pyruvate kinase isoform M2  
1038 and promotes cancer cell survival in glucose-limited conditions. *Science*. **338**,  
1039 1069–1072 (2012).
- 1040 11. K. E. Keller, Z. M. Doctor, Z. W. Dwyer, Y.-S. Lee, SAICAR induces protein kinase  
1041 activity of PKM2 that is necessary for sustained proliferative signaling of cancer  
1042 cells. *Mol. Cell*. **53**, 700–709 (2014).
- 1043 12. M. Yan, S. Chakravarthy, J. M. Tokuda, L. Pollack, G. D. Bowman, Y.-S. Lee,  
1044 Succinyl-5-aminoimidazole-4-carboxamide-1-ribose 5'-Phosphate (SAICAR)  
1045 Activates Pyruvate Kinase Isoform M2 (PKM2) in Its Dimeric Form. *Biochemistry*.  
1046 **55**, 4731–4736 (2016).
- 1047 13. S. Tamiya, L. Liu, H. J. Kaplan, Epithelial-mesenchymal transition and proliferation  
1048 of retinal pigment epithelial cells initiated upon loss of cell-cell contact. *Invest.*  
1049 *Ophthalmol. Vis. Sci.* **51**, 2755–2763 (2010).

- 1050 14. G. Hoxhaj, J. Hughes-Hallett, R. C. Timson, E. Ilagan, M. Yuan, J. M. Asara, I.  
1051 Ben-Sahra, B. D. Manning, The mTORC1 Signaling Network Senses Changes in  
1052 Cellular Purine Nucleotide Levels. *Cell Rep.* **21**, 1331–1346 (2017).
- 1053 15. M. P. Kim, Y. Zhang, G. Lozano, Mutant p53: Multiple Mechanisms Define Biologic  
1054 Activity in Cancer. *Front. Oncol.* **5**, 249 (2015).
- 1055 16. B. Benedict, T. van Harn, M. Dekker, S. Hermsen, A. Kucukosmanoglu, W. Pieters,  
1056 E. Delzenne-Goette, J. C. Dorsman, E. Petermann, F. Foijer, H. Te Riele, Loss of  
1057 p53 suppresses replication-stress-induced DNA breakage in G1/S checkpoint  
1058 deficient cells. *Elife.* **7** (2018), doi:10.7554/eLife.37868.
- 1059 17. V. Gottifredi, S. Shieh, Y. Taya, C. Prives, p53 accumulates but is functionally  
1060 impaired when DNA synthesis is blocked. *Proc. Natl. Acad. Sci. USA.* **98**, 1036–  
1061 1041 (2001).
- 1062 18. T. Casar Tena, M. D. Burkhalter, M. Philipp, Left-right asymmetry in the light of  
1063 TOR: An update on what we know so far. *Biol. Cell.* **107**, 306–318 (2015).
- 1064 19. R. Vaz, W. Hofmeister, A. Lindstrand, Zebrafish models of neurodevelopmental  
1065 disorders: limitations and benefits of current tools and techniques. *Int. J. Mol. Sci.*  
1066 **20** (2019), doi:10.3390/ijms20061296.
- 1067 20. T. H. Stracker, C. G. Morrison, F. Gergely, Molecular causes of primary  
1068 microcephaly and related diseases: a report from the UNIA Workshop.  
1069 *Chromosoma.* **129**, 115–120 (2020).
- 1070 21. M. O'Driscoll, V. L. Ruiz-Perez, C. G. Woods, P. A. Jeggo, J. A. Goodship, A  
1071 splicing mutation affecting expression of ataxia-telangiectasia and Rad3-related  
1072 protein (ATR) results in Seckel syndrome. *Nat. Genet.* **33**, 497–501 (2003).
- 1073 22. M. Murga, S. Bunting, M. F. Montaña, R. Soria, F. Mulero, M. Cañamero, Y. Lee,  
1074 P. J. McKinnon, A. Nussenzweig, O. Fernandez-Capetillo, A mouse model of ATR-  
1075 Seckel shows embryonic replicative stress and accelerated aging. *Nat. Genet.* **41**,  
1076 891–898 (2009).
- 1077 23. M. S. Al-Dosari, R. Shaheen, D. Colak, F. S. Alkuraya, Novel CENPJ mutation  
1078 causes Seckel syndrome. *J. Med. Genet.* **47**, 411–414 (2010).
- 1079 24. J.-H. Sir, A. R. Barr, A. K. Nicholas, O. P. Carvalho, M. Khurshid, A. Sossick, S.  
1080 Reichelt, C. D'Santos, C. G. Woods, F. Gergely, A primary microcephaly protein  
1081 complex forms a ring around parental centrioles. *Nat. Genet.* **43**, 1147–1153  
1082 (2011).
- 1083 25. H. Bazzi, K. V. Anderson, Acentriolar mitosis activates a p53-dependent apoptosis  
1084 pathway in the mouse embryo. *Proc. Natl. Acad. Sci. USA.* **111**, E1491–500  
1085 (2014).
- 1086 26. R. Insolera, H. Bazzi, W. Shao, K. V. Anderson, S.-H. Shi, Cortical neurogenesis in  
1087 the absence of centrioles. *Nat. Neurosci.* **17**, 1528–1535 (2014).
- 1088 27. M. Marjanović, C. Sánchez-Huertas, B. Terré, R. Gómez, J. F. Scheel, S.  
1089 Pacheco, P. A. Knobel, A. Martínez-Marchal, S. Aivio, L. Palenzuela, U. Wolfrum,  
1090 P. J. McKinnon, J. A. Suja, I. Roig, V. Costanzo, J. Lüders, T. H. Stracker, CEP63  
1091 deficiency promotes p53-dependent microcephaly and reveals a role for the  
1092 centrosome in meiotic recombination. *Nat. Commun.* **6**, 7676 (2015).
- 1093 28. R. E. McIntyre, P. Lakshminarasimhan Chavali, O. Ismail, D. M. Carragher, G.  
1094 Sanchez-Andrade, J. V. Forment, B. Fu, M. Del Castillo Velasco-Herrera, A.  
1095 Edwards, L. van der Weyden, F. Yang, Sanger Mouse Genetics Project, R.  
1096 Ramirez-Solis, J. Estabel, F. A. Gallagher, D. W. Logan, M. J. Arends, S. H.  
1097 Tsang, V. B. Mahajan, C. L. Scudamore, J. K. White, S. P. Jackson, F. Gergely, D.  
1098 J. Adams, Disruption of mouse Cenpj, a regulator of centriole biogenesis,  
1099 phenocopies Seckel syndrome. *PLoS Genet.* **8**, e1003022 (2012).

- 1100 29. Y.-N. Lin, Y.-S. Lee, S.-K. Li, T. K. Tang, Loss of CPAP in developing mouse brain  
1101 and its functional implication for human primary microcephaly. *J. Cell Sci.* **133**  
1102 (2020), doi:10.1242/jcs.243592.
- 1103 30. C. S. Fong, G. Mazo, T. Das, J. Goodman, M. Kim, B. P. O'Rourke, D. Izquierdo,  
1104 M.-F. B. Tsou, 53BP1 and USP28 mediate p53-dependent cell cycle arrest in  
1105 response to centrosome loss and prolonged mitosis. *Elife.* **5** (2016),  
1106 doi:10.7554/eLife.16270.
- 1107 31. B. G. Lambrus, V. Daggubati, Y. Uetake, P. M. Scott, K. M. Clutario, G. Sluder, A.  
1108 J. Holland, A USP28-53BP1-p53-p21 signaling axis arrests growth after  
1109 centrosome loss or prolonged mitosis. *J. Cell Biol.* **214**, 143–153 (2016).
- 1110 32. C. R. McKeown, H. T. Cline, Nutrient restriction causes reversible G2 arrest in  
1111 *Xenopus* neural progenitors. *Development.* **146** (2019), doi:10.1242/dev.178871.
- 1112 33. D. Cloëtta, V. Thomanetz, C. Baranek, R. M. Lustenberger, S. Lin, F. Oliveri, S.  
1113 Atanasoski, M. A. Rüegg, Inactivation of mTORC1 in the developing brain causes  
1114 microcephaly and affects gliogenesis. *J. Neurosci.* **33**, 7799–7810 (2013).
- 1115 34. G. Zurlo, X. Liu, M. Takada, C. Fan, J. M. Simon, T. S. Ptacek, J. Rodriguez, A.  
1116 von Kriegsheim, J. Liu, J. W. Locasale, A. Robinson, J. Zhang, J. M. Holler, B.  
1117 Kim, M. Zikánová, J. Bierau, L. Xie, X. Chen, M. Li, C. M. Perou, Q. Zhang, Prolyl  
1118 hydroxylase substrate adenylosuccinate lyase is an oncogenic driver in triple  
1119 negative breast cancer. *Nat. Commun.* **10**, 5177 (2019).
- 1120 35. G. M. Xavier, M. Seppala, W. Barrell, A. A. Birjandi, F. Geoghegan, M. T.  
1121 Cobourne, Hedgehog receptor function during craniofacial development. *Dev. Biol.*  
1122 **415**, 198–215 (2016).
- 1123 36. F. Bangs, K. V. Anderson, Primary cilia and mammalian hedgehog signaling. *Cold*  
1124 *Spring Harb. Perspect. Biol.* **9** (2017), doi:10.1101/cshperspect.a028175.
- 1125 37. J. J. Breunig, M. R. Sarkisian, J. I. Arellano, Y. M. Morozov, A. E. Ayoub, S. Sojitra,  
1126 B. Wang, R. A. Flavell, P. Rakic, T. Town, Primary cilia regulate hippocampal  
1127 neurogenesis by mediating sonic hedgehog signaling. *Proc. Natl. Acad. Sci. USA.*  
1128 **105**, 13127–13132 (2008).
- 1129 38. Y.-G. Han, N. Spassky, M. Romaguera-Ros, J.-M. Garcia-Verdugo, A. Aguilar, S.  
1130 Schneider-Maunoury, A. Alvarez-Buylla, Hedgehog signaling and primary cilia are  
1131 required for the formation of adult neural stem cells. *Nat. Neurosci.* **11**, 277–284  
1132 (2008).
- 1133 39. D. I. Kim, S. C. Jensen, K. A. Noble, B. Kc, K. H. Roux, K. Motamedchaboki, K. J.  
1134 Roux, An improved smaller biotin ligase for BioID proximity labeling. *Mol. Biol. Cell.*  
1135 **27**, 1188–1196 (2016).
- 1136 40. E. Campeau, V. E. Ruhl, F. Rodier, C. L. Smith, B. L. Rahmberg, J. O. Fuss, J.  
1137 Campisi, P. Yaswen, P. K. Cooper, P. D. Kaufman, A versatile viral system for  
1138 expression and depletion of proteins in mammalian cells. *PLoS One.* **4**, e6529  
1139 (2009).
- 1140 41. Y. A. Ogungbenro, T. C. Tena, D. Gaboriau, P. Lalor, P. Dockery, M. Philipp, C. G.  
1141 Morrison, Centrobins control primary ciliogenesis in vertebrates. *J. Cell Biol.* **217**,  
1142 1205–1215 (2018).
- 1143 42. C. Pantoja, M. Serrano, Murine fibroblasts lacking p21 undergo senescence and  
1144 are resistant to transformation by oncogenic Ras. *Oncogene.* **18**, 4974–4982  
1145 (1999).
- 1146 43. K. M. Jaffe, S. Y. Thiberge, M. E. Bisher, R. D. Burdine, Imaging cilia in zebrafish.  
1147 *Methods Cell Biol.* **97**, 415–435 (2010).
- 1148 44. B. Thisse, C. Thisse, In situ hybridization on whole-mount zebrafish embryos and  
1149 young larvae. *Methods Mol. Biol.* **1211**, 53–67 (2014).

- 1150 45. M. D. Burkhalter, G. B. Fralish, R. T. Premont, M. G. Caron, M. Philipp, Grk5l  
1151 controls heart development by limiting mTOR signaling during symmetry breaking.  
1152 *Cell Rep.* **4**, 625–632 (2013).  
1153 46. V. Hamburger, H. L. Hamilton, A series of normal stages in the development of the  
1154 chick embryo. 1951. *Dev. Dyn.* **195**, 231–272 (1992).  
1155 47. A. Herrera, M. Saade, A. Menendez, E. Marti, S. Pons, Sustained Wnt/ $\beta$ -catenin  
1156 signalling causes neuroepithelial aberrations through the accumulation of aPKC at  
1157 the apical pole. *Nat. Commun.* **5**, 4168 (2014).  
1158
